# Supplementary material
Source: publisher figshare collection journal article supplement (https://tandf.figshare.com/articles/dataset/_/1297346)
Supplement: Supplementary file 1 [file 1]

Sample 12AP20 Formation B  
Coordinates N75° 28' 58.4"  
E135° 57' 33.0"

| Analysis Name         | [U] (ppm) | [Th] (ppm) | U/Th  | 207Pb/235U | 2 sigma | 206Pb/238U | 2 sigma | 207Pb/206Pb | 2 sigma | Error Correlation | 206Pb/238U | 2 sigma | 207Pb/206Pb | 2 sigma | Preferred Age | 2 sigma | Discordance |
|-----------------------|-----------|------------|-------|------------|---------|------------|---------|-------------|---------|-------------------|------------|---------|-------------|---------|---------------|---------|-------------|
| 1357_010_Zrn_a_01_94  | 1763.27   | 1361.47    | 1.30  | 0.3853     | 0.0307  | 0.0509     | 0.0026  | 0.0549      | 0.0038  | 0.4870            | 320.0      | 16.2    | 408.6       | 156.2   | 320.0         | 16.2    | 27.7        |
| 1357_010_Zrn_a_01_115 | 133.00    | 67.79      | 1.96  | 0.5057     | 0.0547  | 0.0666     | 0.0033  | 0.0551      | 0.0060  | 0.1609            | 415.7      | 20.1    | 414.9       | 245.4   | 415.7         | 20.1    | -0.2        |
| 1357_010_Zrn_a_01_21  | 51.69     | 25.66      | 2.01  | 0.5203     | 0.0627  | 0.0673     | 0.0040  | 0.0561      | 0.0065  | 0.2950            | 420.0      | 24.4    | 454.5       | 259.5   | 420.0         | 24.4    | 8.2         |
| 1357_010_Zrn_a_01_100 | 674.78    | 372.86     | 1.81  | 0.5373     | 0.0322  | 0.0693     | 0.0028  | 0.0562      | 0.0030  | 0.4803            | 432.1      | 16.7    | 460.6       | 116.6   | 432.1         | 16.7    | 6.6         |
| 1357_010_Zrn_a_01_61  | 169.77    | 147.48     | 1.15  | 0.5738     | 0.0629  | 0.0747     | 0.0031  | 0.0557      | 0.0060  | 0.1854            | 464.4      | 18.7    | 440.8       | 241.8   | 464.4         | 18.7    | -5.1        |
| 1357_010_Zrn_a_01_32  | 365.63    | 286.08     | 1.28  | 0.5731     | 0.0607  | 0.0750     | 0.0034  | 0.0554      | 0.0058  | 0.2102            | 466.2      | 20.1    | 429.4       | 233.8   | 466.2         | 20.1    | -7.9        |
| 1357_010_Zrn_a_01_9   | 765.28    | 8.71       | 87.88 | 0.5992     | 0.0335  | 0.0756     | 0.0030  | 0.0575      | 0.0028  | 0.5111            | 469.8      | 18.2    | 510.1       | 105.6   | 469.8         | 18.2    | 8.6         |
| 1357_010_Zrn_a_01_79  | 523.91    | 270.26     | 1.94  | 0.5893     | 0.0334  | 0.0757     | 0.0025  | 0.0565      | 0.0031  | 0.2876            | 470.5      | 14.9    | 470.3       | 120.5   | 470.5         | 14.9    | 0.0         |
| 1357_010_Zrn_a_01_119 | 1831.33   | 521.96     | 3.51  | 0.6312     | 0.0366  | 0.0770     | 0.0034  | 0.0594      | 0.0028  | 0.5715            | 478.2      | 20.1    | 583.6       | 103.3   | 478.2         | 20.1    | 22.0        |
| 1357_010_Zrn_a_01_102 | 824.00    | 96.83      | 8.51  | 0.6252     | 0.0311  | 0.0774     | 0.0025  | 0.0586      | 0.0027  | 0.4071            | 480.4      | 14.7    | 552.5       | 99.3    | 480.4         | 14.7    | 15.0        |
| 1357_010_Zrn_a_01_111 | 469.86    | 253.65     | 1.85  | 0.6388     | 0.0398  | 0.0807     | 0.0031  | 0.0574      | 0.0033  | 0.3802            | 500.3      | 18.3    | 507.2       | 127.3   | 500.3         | 18.3    | 1.4         |
| 1357_010_Zrn_a_01_31  | 332.11    | 117.16     | 2.83  | 0.6370     | 0.0427  | 0.0820     | 0.0045  | 0.0563      | 0.0039  | 0.3168            | 508.2      | 26.8    | 465.0       | 153.3   | 508.2         | 26.8    | -8.5        |
| 1357_010_Zrn_a_01_47  | 278.92    | 533.55     | 0.52  | 0.6499     | 0.0530  | 0.0825     | 0.0038  | 0.0571      | 0.0042  | 0.4347            | 511.0      | 22.8    | 496.9       | 162.1   | 511.0         | 22.8    | -2.8        |
| 1357_010_Zrn_a_01_3   | 1383.71   | 142.11     | 9.74  | 0.7143     | 0.0383  | 0.0846     | 0.0033  | 0.0613      | 0.0029  | 0.4583            | 523.4      | 19.4    | 648.1       | 102.6   | 523.4         | 19.4    | 23.8        |
| 1357_010_Zrn_a_01_60  | 1436.80   | 978.62     | 1.47  | 0.7060     | 0.0322  | 0.0867     | 0.0027  | 0.0591      | 0.0025  | 0.3323            | 536.0      | 15.8    | 569.5       | 93.7    | 536.0         | 15.8    | 6.3         |
| 1357_010_Zrn_a_01_10  | 348.77    | 828.87     | 0.42  | 0.6884     | 0.0590  | 0.0872     | 0.0042  | 0.0572      | 0.0045  | 0.3921            | 539.0      | 25.2    | 501.1       | 174.4   | 539.0         | 25.2    | -7.0        |
| 1357_010_Zrn_a_01_24  | 261.34    | 415.98     | 0.63  | 0.7264     | 0.0471  | 0.0882     | 0.0036  | 0.0597      | 0.0037  | 0.3452            | 544.7      | 21.1    | 594.5       | 133.2   | 544.7         | 21.1    | 9.1         |
| 1357_010_Zrn_a_01_84  | 1192.32   | 1446.28    | 0.82  | 0.7075     | 0.0437  | 0.0883     | 0.0036  | 0.0581      | 0.0033  | 0.4088            | 545.5      | 21.6    | 534.0       | 124.6   | 545.5         | 21.6    | -2.1        |
| 1357_010_Zrn_a_01_76  | 420.99    | 344.94     | 1.22  | 0.7138     | 0.0408  | 0.0885     | 0.0030  | 0.0585      | 0.0032  | 0.3246            | 546.7      | 17.8    | 548.4       | 118.3   | 546.7         | 17.8    | 0.3         |
| 1357_010_Zrn_a_01_4   | 154.66    | 112.91     | 1.37  | 0.7479     | 0.0652  | 0.0895     | 0.0042  | 0.0606      | 0.0050  | 0.3587            | 552.3      | 24.9    | 626.4       | 176.2   | 552.3         | 24.9    | 13.4        |
| 1357_010_Zrn_a_01_103 | 268.64    | 159.05     | 1.69  | 0.7175     | 0.0482  | 0.0900     | 0.0034  | 0.0578      | 0.0037  | 0.2815            | 555.7      | 20.0    | 522.0       | 142.4   | 555.7         | 20.0    | -6.1        |
| 1357_010_Zrn_a_01_19  | 202.45    | 159.46     | 1.27  | 0.7641     | 0.0543  | 0.0914     | 0.0032  | 0.0606      | 0.0042  | 0.2606            | 564.0      | 19.2    | 625.5       | 148.2   | 564.0         | 19.2    | 10.9        |
| 1357_010_Zrn_a_01_57  | 105.47    | 47.85      | 2.20  | 0.7885     | 0.0775  | 0.0932     | 0.0041  | 0.0614      | 0.0059  | 0.2569            | 574.4      | 24.3    | 651.9       | 205.6   | 574.4         | 24.3    | 13.5        |
| 1357_010_Zrn_a_01_34  | 727.18    | 1154.08    | 0.63  | 0.7773     | 0.0435  | 0.0954     | 0.0037  | 0.0591      | 0.0028  | 0.5498            | 587.3      | 22.1    | 570.7       | 101.8   | 587.3         | 22.1    | -2.8        |
| 1357_010_Zrn_a_01_56  | 527.27    | 512.70     | 1.03  | 0.7723     | 0.0399  | 0.0956     | 0.0032  | 0.0586      | 0.0028  | 0.3919            | 588.7      | 18.8    | 551.4       | 103.8   | 588.7         | 18.8    | -6.3        |
| 1357_010_Zrn_a_01_77  | 226.96    | 351.32     | 0.65  | 0.8178     | 0.0676  | 0.0962     | 0.0040  | 0.0616      | 0.0049  | 0.3150            | 592.2      | 23.5    | 661.8       | 169.0   | 592.2         | 23.5    | 11.8        |
| 1357_010_Zrn_a_01_42  | 239.73    | 249.36     | 0.96  | 0.8611     | 0.1191  | 0.0962     | 0.0087  | 0.0649      | 0.0075  | 0.5566            | 592.3      | 51.1    | 770.9       | 243.2   | 592.3         | 51.1    | 30.1        |
| 1357_010_Zrn_a_01_120 | 687.52    | 75.00      | 9.17  | 0.9121     | 0.0562  | 0.1013     | 0.0041  | 0.0653      | 0.0037  | 0.4122            | 622.3      | 23.7    | 783.3       | 118.3   | 622.3         | 23.7    | 25.9        |
| 1357_010_Zrn_a_01_105 | 844.64    | 73.98      | 11.42 | 0.8555     | 0.0557  | 0.1028     | 0.0048  | 0.0604      | 0.0035  | 0.4759            | 630.8      | 27.8    | 616.6       | 124.6   | 630.8         | 27.8    | -2.3        |
| 1357_010_Zrn_a_01_48  | 389.68    | 220.44     | 1.77  | 0.8816     | 0.0519  | 0.1033     | 0.0042  | 0.0619      | 0.0033  | 0.4183            | 633.6      | 24.5    | 671.2       | 115.5   | 633.6         | 24.5    | 5.9         |
| 1357_010_Zrn_a_01_33  | 482.37    | 270.67     | 1.78  | 0.8482     | 0.0537  | 0.1033     | 0.0045  | 0.0596      | 0.0031  | 0.5521            | 633.6      | 26.4    | 587.7       | 114.5   | 633.6         | 26.4    | -7.2        |
| 1357_010_Zrn_a_01_27  | 539.29    | 368.63     | 1.46  | 0.9100     | 0.0456  | 0.1046     | 0.0038  | 0.0631      | 0.0028  | 0.4555            | 641.5      | 22.0    | 710.7       | 94.8    | 641.5         | 22.0    | 10.8        |
| 1357_010_Zrn_a_01_26  | 252.33    | 90.55      | 2.79  | 0.9407     | 0.0708  | 0.1067     | 0.0039  | 0.0639      | 0.0047  | 0.2638            | 653.7      | 22.7    | 739.2       | 154.2   | 653.7         | 22.7    | 13.1        |
| 1357_010_Zrn_a_01_83  | 226.11    | 179.43     | 1.26  | 0.9203     | 0.0496  | 0.1094     | 0.0039  | 0.0610      | 0.0032  | 0.2937            | 669.4      | 22.4    | 639.2       | 112.4   | 669.4         | 22.4    | -4.5        |
| 1357_010_Zrn_a_01_67  | 744.99    | 509.68     | 1.46  | 0.9214     | 0.0461  | 0.1107     | 0.0034  | 0.0604      | 0.0029  | 0.3196            | 676.9      | 19.8    | 616.6       | 102.5   | 676.9         | 19.8    | -8.9        |
| 1357_010_Zrn_a_01_28  | 342.22    | 117.54     | 2.91  | 1.3920     | 0.1140  | 0.1445     | 0.0063  | 0.0699      | 0.0054  | 0.3556            | 869.9      | 35.3    | 924.9       | 157.7   | 869.9         | 35.3    | 6.3         |
| 1357_010_Zrn_a_01_68  | 241.35    | 58.40      | 4.13  | 1.4227     | 0.0920  | 0.1446     | 0.0056  | 0.0713      | 0.0043  | 0.3899            | 870.8      | 31.5    | 967.3       | 121.8   | 870.8         | 31.5    | 11.1        |
| 1357_010_Zrn_a_01_46  | 526.93    | 76.38      | 6.90  | 1.4962     | 0.0765  | 0.1568     | 0.0063  | 0.0692      | 0.0032  | 0.4738            | 938.8      | 35.1    | 905.3       | 93.9    | 938.8         | 31.1    | -3.6        |
| 1357_010_Zrn_a_01_75  | 445.39    | 95.53      | 4.66  | 1.4845     | 0.0720  | 0.1552     | 0.0053  | 0.0694      | 0.0033  | 0.2998            | 930.3      | 29.6    | 909.4       | 96.6    | 930.3         | 29.6    | -2.2        |
| 1357_010_Zrn_a_01_106 | 399.17    | 240.46     | 1.66  | 1.5730     | 0.0921  | 0.1568     | 0.0057  | 0.0728      | 0.0038  | 0.4296            | 939.0      | 31.8    | 1007.2      | 107.3   | 939.0         | 31.8    | 7.3         |
| 1357_010_Zrn_a_01_93  | 592.53    | 210.32     | 2.82  | 1.5350     | 0.0799  | 0.1585     | 0.0064  | 0.0702      | 0.0034  | 0.4290            | 948.7      | 35.6    | 934.8       | 98.3    | 948.7         | 35.6    | -1.5        |
| 1357_010_Zrn_a_01_59  | 497.55    | 165.44     | 3.01  | 1.5552     | 0.0743  | 0.1617     | 0.0057  | 0.0698      | 0.0030  | 0.4320            | 966.1      | 31.8    | 921.5       | 89.1    | 966.1         | 31.8    | -4.6        |
| 1357_010_Zrn_a_01_72  | 432.70    | 81.23      | 5.33  | 1.5773     | 0.0770  | 0.1626     | 0.0052  | 0.0703      | 0.0032  | 0.3814            | 971.4      | 28.7    | 938.4       | 92.6    | 971.4         | 28.7    | -3.4        |

|                       |         |        |      |         |        |        |        |        |        |        |        |       |        |       |        |       |      |
|-----------------------|---------|--------|------|---------|--------|--------|--------|--------|--------|--------|--------|-------|--------|-------|--------|-------|------|
| 1357_010_Zrn_a_01_64  | 116.75  | 136.90 | 0.85 | 1.6270  | 0.1304 | 0.1644 | 0.0063 | 0.0718 | 0.0056 | 0.2651 | 981.0  | 34.7  | 980.0  | 158.3 | 981.0  | 34.7  | -0.1 |
| 1357_010_Zrn_a_01_43  | 1536.85 | 634.23 | 2.42 | 1.6613  | 0.1247 | 0.1585 | 0.0098 | 0.0760 | 0.0047 | 0.5849 | 948.4  | 54.4  | 1095.6 | 124.3 | 948.4  | 54.4  | 15.5 |
| 1357_010_Zrn_a_01_81  | 328.05  | 135.53 | 2.42 | 1.5932  | 0.0859 | 0.1674 | 0.0061 | 0.0690 | 0.0034 | 0.4163 | 997.8  | 33.9  | 899.5  | 101.4 | 997.8  | 33.9  | -9.9 |
| 1357_010_Zrn_a_01_107 | 110.18  | 44.86  | 2.46 | 1.6824  | 0.1251 | 0.1676 | 0.0092 | 0.0728 | 0.0051 | 0.4032 | 999.1  | 50.9  | 1008.1 | 143.0 | 999.1  | 50.9  | 0.9  |
| 1357_010_Zrn_a_01_52  | 163.19  | 46.43  | 3.51 | 1.8058  | 0.1524 | 0.1705 | 0.0099 | 0.0768 | 0.0060 | 0.4316 | 1014.7 | 54.8  | 1116.7 | 155.8 | 1116.7 | 155.8 | 10.1 |
| 1357_010_Zrn_a_01_20  | 347.63  | 258.94 | 1.34 | 1.8397  | 0.0907 | 0.1786 | 0.0061 | 0.0747 | 0.0035 | 0.3471 | 1059.6 | 33.5  | 1060.1 | 93.5  | 1060.1 | 93.5  | 0.1  |
| 1357_010_Zrn_a_01_86  | 310.81  | 173.90 | 1.79 | 1.8433  | 0.1042 | 0.1812 | 0.0066 | 0.0738 | 0.0037 | 0.4424 | 1073.4 | 35.9  | 1035.6 | 102.4 | 1035.6 | 102.4 | -3.5 |
| 1357_010_Zrn_a_01_41  | 83.60   | 69.20  | 1.21 | 2.0002  | 0.1741 | 0.1839 | 0.0099 | 0.0789 | 0.0060 | 0.4794 | 1088.1 | 54.2  | 1169.5 | 151.8 | 1169.5 | 151.8 | 7.5  |
| 1357_010_Zrn_a_01_117 | 55.16   | 38.04  | 1.45 | 2.0070  | 0.1729 | 0.1878 | 0.0092 | 0.0775 | 0.0062 | 0.3787 | 1109.4 | 49.7  | 1134.5 | 159.8 | 1134.5 | 159.8 | 2.3  |
| 1357_010_Zrn_a_01_92  | 133.53  | 63.79  | 2.09 | 2.0021  | 0.1265 | 0.1912 | 0.0078 | 0.0759 | 0.0044 | 0.3967 | 1127.8 | 42.5  | 1093.7 | 116.9 | 1093.7 | 116.9 | -3.0 |
| 1357_010_Zrn_a_01_35  | 333.90  | 96.71  | 3.45 | 2.1193  | 0.1335 | 0.1953 | 0.0102 | 0.0787 | 0.0039 | 0.6358 | 1150.3 | 55.1  | 1164.2 | 97.0  | 1164.2 | 97.0  | 1.2  |
| 1357_010_Zrn_a_01_71  | 313.29  | 88.45  | 3.54 | 2.1341  | 0.1191 | 0.1893 | 0.0070 | 0.0818 | 0.0041 | 0.4400 | 1117.5 | 38.1  | 1240.1 | 98.3  | 1240.1 | 98.3  | 11.0 |
| 1357_010_Zrn_a_01_37  | 396.92  | 154.00 | 2.58 | 2.1643  | 0.1124 | 0.1999 | 0.0084 | 0.0785 | 0.0033 | 0.5972 | 1174.7 | 45.2  | 1160.3 | 82.7  | 1160.3 | 82.7  | -1.2 |
| 1357_010_Zrn_a_01_104 | 80.12   | 30.32  | 2.64 | 2.1910  | 0.1550 | 0.1992 | 0.0087 | 0.0798 | 0.0053 | 0.3526 | 1171.3 | 46.5  | 1190.9 | 132.3 | 1190.9 | 132.3 | 1.7  |
| 1357_010_Zrn_a_01_14  | 338.08  | 82.16  | 4.11 | 2.2529  | 0.1466 | 0.2018 | 0.0115 | 0.0810 | 0.0038 | 0.7026 | 1184.7 | 61.9  | 1221.1 | 91.5  | 1221.1 | 91.5  | 3.1  |
| 1357_010_Zrn_a_01_63  | 259.75  | 109.11 | 2.38 | 2.2707  | 0.1224 | 0.2021 | 0.0078 | 0.0815 | 0.0041 | 0.3830 | 1186.3 | 41.9  | 1233.7 | 99.1  | 1233.7 | 99.1  | 4.0  |
| 1357_010_Zrn_a_01_11  | 620.60  | 186.51 | 3.33 | 2.3651  | 0.1251 | 0.2135 | 0.0072 | 0.0804 | 0.0039 | 0.3920 | 1247.3 | 38.2  | 1205.7 | 95.9  | 1205.7 | 95.9  | -3.3 |
| 1357_010_Zrn_a_01_5   | 86.61   | 71.72  | 1.21 | 2.6788  | 0.2066 | 0.2299 | 0.0140 | 0.0845 | 0.0051 | 0.6332 | 1334.0 | 73.5  | 1304.3 | 116.5 | 1304.3 | 116.5 | -2.2 |
| 1357_010_Zrn_a_01_25  | 702.09  | 441.76 | 1.59 | 2.6965  | 0.1379 | 0.2241 | 0.0082 | 0.0873 | 0.0038 | 0.5396 | 1303.7 | 43.0  | 1366.0 | 83.2  | 1366.0 | 83.2  | 4.8  |
| 1357_010_Zrn_a_01_22  | 744.51  | 284.32 | 2.62 | 2.7432  | 0.1211 | 0.2272 | 0.0081 | 0.0876 | 0.0035 | 0.4439 | 1320.0 | 42.7  | 1372.7 | 76.5  | 1372.7 | 76.5  | 4.0  |
| 1357_010_Zrn_a_01_82  | 128.46  | 62.31  | 2.06 | 2.7546  | 0.1641 | 0.2264 | 0.0093 | 0.0882 | 0.0045 | 0.5045 | 1315.7 | 49.0  | 1387.6 | 98.9  | 1387.6 | 98.9  | 5.5  |
| 1357_010_Zrn_a_01_8   | 140.69  | 79.39  | 1.77 | 2.7803  | 0.1642 | 0.2333 | 0.0093 | 0.0864 | 0.0049 | 0.3253 | 1351.5 | 48.5  | 1348.3 | 109.7 | 1348.3 | 109.7 | -0.2 |
| 1357_010_Zrn_a_01_85  | 637.70  | 221.06 | 2.88 | 2.8603  | 0.1474 | 0.2372 | 0.0106 | 0.0875 | 0.0042 | 0.4439 | 1371.9 | 55.2  | 1371.0 | 92.8  | 1371.0 | 92.8  | -0.1 |
| 1357_010_Zrn_a_01_50  | 531.45  | 279.19 | 1.90 | 2.9399  | 0.1423 | 0.2416 | 0.0091 | 0.0883 | 0.0040 | 0.4088 | 1395.0 | 47.0  | 1388.1 | 86.1  | 1388.1 | 86.1  | -0.5 |
| 1357_010_Zrn_a_01_74  | 179.02  | 91.20  | 1.96 | 2.9639  | 0.1841 | 0.2388 | 0.0104 | 0.0900 | 0.0050 | 0.4533 | 1380.6 | 54.0  | 1425.7 | 106.7 | 1425.7 | 106.7 | 3.3  |
| 1357_010_Zrn_a_01_36  | 391.87  | 129.63 | 3.02 | 3.0476  | 0.1580 | 0.2473 | 0.0103 | 0.0894 | 0.0038 | 0.5883 | 1424.6 | 53.3  | 1412.2 | 80.3  | 1412.2 | 80.3  | -0.9 |
| 1357_010_Zrn_a_01_7   | 127.59  | 47.56  | 2.68 | 3.0934  | 0.1865 | 0.2505 | 0.0102 | 0.0895 | 0.0047 | 0.4971 | 1441.3 | 52.6  | 1415.9 | 100.1 | 1415.9 | 100.1 | -1.8 |
| 1357_010_Zrn_a_01_39  | 160.42  | 98.04  | 1.64 | 3.1741  | 0.1829 | 0.2522 | 0.0111 | 0.0913 | 0.0046 | 0.5001 | 1449.9 | 56.9  | 1452.3 | 95.8  | 1452.3 | 95.8  | 0.2  |
| 1357_010_Zrn_a_01_116 | 134.82  | 120.55 | 1.12 | 3.3996  | 0.2219 | 0.2609 | 0.0127 | 0.0945 | 0.0054 | 0.5108 | 1494.6 | 65.2  | 1518.0 | 106.9 | 1518.0 | 106.9 | 1.6  |
| 1357_010_Zrn_a_01_73  | 547.09  | 277.56 | 1.97 | 3.4644  | 0.1623 | 0.2710 | 0.0086 | 0.0927 | 0.0039 | 0.4556 | 1545.7 | 43.7  | 1482.3 | 79.2  | 1482.3 | 79.2  | -4.1 |
| 1357_010_Zrn_a_01_101 | 417.51  | 163.75 | 2.55 | 3.4716  | 0.1813 | 0.2692 | 0.0095 | 0.0935 | 0.0043 | 0.4628 | 1536.7 | 48.1  | 1498.8 | 87.6  | 1498.8 | 87.6  | -2.5 |
| 1357_010_Zrn_a_01_30  | 168.63  | 155.32 | 1.09 | 3.5340  | 0.1862 | 0.2678 | 0.0113 | 0.0957 | 0.0042 | 0.5526 | 1529.4 | 57.4  | 1542.4 | 82.9  | 1542.4 | 82.9  | 0.9  |
| 1357_010_Zrn_a_01_44  | 757.53  | 393.10 | 1.93 | 3.5712  | 0.1936 | 0.2710 | 0.0114 | 0.0956 | 0.0043 | 0.5700 | 1545.9 | 57.9  | 1539.4 | 83.9  | 1539.4 | 83.9  | -0.4 |
| 1357_010_Zrn_a_01_70  | 179.02  | 115.76 | 1.55 | 3.5813  | 0.2685 | 0.2742 | 0.0156 | 0.0947 | 0.0061 | 0.5271 | 1562.1 | 79.1  | 1522.7 | 122.4 | 1522.7 | 122.4 | -2.5 |
| 1357_010_Zrn_a_01_55  | 738.01  | 368.27 | 2.00 | 3.8471  | 0.1764 | 0.2764 | 0.0101 | 0.1010 | 0.0041 | 0.4730 | 1573.0 | 51.1  | 1641.8 | 75.6  | 1641.8 | 75.6  | 4.4  |
| 1357_010_Zrn_a_01_98  | 1124.42 | 550.94 | 2.04 | 4.0697  | 0.1875 | 0.2782 | 0.0096 | 0.1061 | 0.0045 | 0.3919 | 1582.4 | 48.3  | 1733.3 | 78.1  | 1733.3 | 78.1  | 9.5  |
| 1357_010_Zrn_a_01_65  | 56.30   | 26.64  | 2.11 | 4.1263  | 0.2427 | 0.2949 | 0.0130 | 0.1015 | 0.0058 | 0.3586 | 1666.1 | 64.9  | 1651.2 | 105.5 | 1651.2 | 105.5 | -0.9 |
| 1357_010_Zrn_a_01_96  | 439.98  | 403.69 | 1.09 | 4.2022  | 0.2194 | 0.3025 | 0.0124 | 0.1007 | 0.0044 | 0.5413 | 1703.8 | 61.6  | 1637.8 | 81.8  | 1637.8 | 81.8  | -3.9 |
| 1357_010_Zrn_a_01_54  | 142.24  | 87.95  | 1.62 | 4.3190  | 0.2382 | 0.3088 | 0.0130 | 0.1014 | 0.0047 | 0.5452 | 1734.7 | 64.1  | 1650.8 | 86.0  | 1650.8 | 86.0  | -4.8 |
| 1357_010_Zrn_a_01_89  | 222.18  | 70.65  | 3.14 | 4.5219  | 0.2153 | 0.3064 | 0.0101 | 0.1070 | 0.0046 | 0.4248 | 1723.0 | 50.1  | 1749.5 | 78.9  | 1749.5 | 78.9  | 1.5  |
| 1357_010_Zrn_a_01_112 | 322.00  | 246.17 | 1.31 | 4.5728  | 0.2391 | 0.3101 | 0.0113 | 0.1070 | 0.0050 | 0.4438 | 1741.1 | 55.5  | 1748.2 | 85.9  | 1748.2 | 85.9  | 0.4  |
| 1357_010_Zrn_a_01_88  | 324.33  | 70.73  | 4.59 | 4.7718  | 0.2304 | 0.3165 | 0.0105 | 0.1094 | 0.0047 | 0.4440 | 1772.6 | 51.4  | 1788.6 | 78.8  | 1788.6 | 78.8  | 0.9  |
| 1357_010_Zrn_a_01_78  | 91.07   | 52.63  | 1.73 | 4.8178  | 0.2616 | 0.3258 | 0.0122 | 0.1072 | 0.0057 | 0.2965 | 1818.0 | 59.3  | 1753.2 | 97.4  | 1753.2 | 97.4  | -3.6 |
| 1357_010_Zrn_a_01_23  | 195.15  | 123.98 | 1.57 | 5.0336  | 0.2331 | 0.3291 | 0.0114 | 0.1109 | 0.0049 | 0.3374 | 1833.9 | 55.4  | 1814.9 | 80.1  | 1814.9 | 80.1  | -1.0 |
| 1357_010_Zrn_a_01_40  | 113.50  | 57.33  | 1.98 | 5.7593  | 0.3400 | 0.3514 | 0.0147 | 0.1189 | 0.0064 | 0.4414 | 1941.1 | 70.0  | 1939.4 | 95.6  | 1939.4 | 95.6  | -0.1 |
| 1357_010_Zrn_a_01_62  | 30.82   | 26.90  | 1.15 | 10.3360 | 0.7598 | 0.4759 | 0.0254 | 0.1575 | 0.0096 | 0.5689 | 2509.2 | 111.0 | 2429.3 | 102.9 | 2429.3 | 102.9 | -3.2 |
| 1357_010_Zrn_a_01_90  | 30.18   | 34.31  | 0.88 | 12.8859 | 0.9304 | 0.5257 | 0.0262 | 0.1778 | 0.0111 | 0.5089 | 2723.1 | 110.5 | 2632.4 | 103.8 | 2632.4 | 103.8 | -3.3 |

|                       |        |       |      |         |        |        |        |        |        |        |        |       |        |      |        |      |      |
|-----------------------|--------|-------|------|---------|--------|--------|--------|--------|--------|--------|--------|-------|--------|------|--------|------|------|
| 1357_010_Zrn_a_01_113 | 59.22  | 30.27 | 1.96 | 16.2486 | 0.8940 | 0.5818 | 0.0248 | 0.2026 | 0.0094 | 0.5363 | 2956.1 | 100.9 | 2846.9 | 75.9 | 2846.9 | 75.9 | -3.7 |
| 1357_010_Zrn_a_01_58  | 117.47 | 60.44 | 1.94 | 20.7749 | 1.1317 | 0.6233 | 0.0265 | 0.2417 | 0.0105 | 0.6016 | 3123.0 | 105.2 | 3131.5 | 69.2 | 3131.5 | 69.2 | 0.3  |

Sample 12AP33 Formation C  
Coordinates N75° 22' 59.4"  
E135° 30' 56.1"

| Analysis Name        | [U] (ppm) | [Th] (ppm) | U/Th | 207Pb/235U | 2 sigma | 206Pb/238U | 2 sigma | 207Pb/206Pb | 2 sigma | Error Correlation | 206Pb/238U | 2 sigma | 207Pb/206Pb | 2 sigma | Preferred Age | 2 sigma | Discordance |
|----------------------|-----------|------------|------|------------|---------|------------|---------|-------------|---------|-------------------|------------|---------|-------------|---------|---------------|---------|-------------|
| 1357_011_Zrn_a_01_2  | 523.27    | 136.52     | 3.83 | 0.3795     | 0.0237  | 0.0526     | 0.0018  | 0.0523      | 0.0031  | 0.3305            | 330.4      | 10.8    | 300.2       | 134.5   | 330.4         | 10.8    | -9.2        |
| 1357_011_Zrn_a_01_3  | 175.72    | 172.14     | 1.02 | 0.3619     | 0.0395  | 0.0493     | 0.0028  | 0.0533      | 0.0060  | 0.1549            | 310.0      | 17.2    | 340.5       | 256.4   | 310.0         | 17.2    | 9.8         |
| 1357_011_Zrn_a_01_4  | 447.47    | 805.80     | 0.56 | 1.2289     | 0.0683  | 0.1298     | 0.0045  | 0.0687      | 0.0036  | 0.3602            | 786.7      | 25.5    | 888.7       | 107.2   | 786.7         | 25.5    | 13.0        |
| 1357_011_Zrn_a_01_6  | 585.36    | 508.58     | 1.15 | 0.3815     | 0.0290  | 0.0504     | 0.0018  | 0.0549      | 0.0039  | 0.3597            | 317.2      | 11.3    | 406.1       | 159.0   | 317.2         | 11.3    | 28.0        |
| 1357_011_Zrn_a_01_12 | 1323.86   | 953.04     | 1.39 | 0.3392     | 0.0196  | 0.0465     | 0.0021  | 0.0529      | 0.0025  | 0.5774            | 292.8      | 12.7    | 326.3       | 107.4   | 292.8         | 12.7    | 11.4        |
| 1357_011_Zrn_a_01_14 | 692.92    | 504.36     | 1.37 | 0.3283     | 0.0251  | 0.0447     | 0.0016  | 0.0533      | 0.0039  | 0.3216            | 281.9      | 9.9     | 340.3       | 164.4   | 281.9         | 9.9     | 20.7        |
| 1357_011_Zrn_a_01_15 | 726.41    | 586.26     | 1.24 | 0.3436     | 0.0317  | 0.0465     | 0.0017  | 0.0535      | 0.0049  | 0.1838            | 293.2      | 10.7    | 352.1       | 206.1   | 293.2         | 10.7    | 20.1        |
| 1357_011_Zrn_a_01_17 | 248.08    | 167.33     | 1.48 | 0.5184     | 0.0363  | 0.0662     | 0.0026  | 0.0568      | 0.0038  | 0.3045            | 413.0      | 15.8    | 484.5       | 148.0   | 413.0         | 15.8    | 17.3        |
| 1357_011_Zrn_a_01_19 | 34.99     | 21.27      | 1.64 | 0.5915     | 0.1177  | 0.0753     | 0.0064  | 0.0570      | 0.0112  | 0.2383            | 468.2      | 38.5    | 489.9       | 435.0   | 468.2         | 38.5    | 4.6         |
| 1357_011_Zrn_a_01_22 | 350.37    | 360.50     | 0.97 | 0.3605     | 0.0263  | 0.0487     | 0.0023  | 0.0537      | 0.0036  | 0.4293            | 306.2      | 14.1    | 360.1       | 149.9   | 306.2         | 14.1    | 17.6        |
| 1357_011_Zrn_a_01_24 | 389.74    | 657.25     | 0.59 | 0.3171     | 0.0341  | 0.0433     | 0.0029  | 0.0531      | 0.0051  | 0.4591            | 273.3      | 17.7    | 333.2       | 218.1   | 273.3         | 17.7    | 21.9        |
| 1357_011_Zrn_a_01_25 | 161.30    | 113.91     | 1.42 | 0.3582     | 0.0576  | 0.0494     | 0.0037  | 0.0526      | 0.0085  | 0.2098            | 310.8      | 22.5    | 311.8       | 368.4   | 310.8         | 22.5    | 0.3         |
| 1357_011_Zrn_a_01_27 | 202.31    | 177.92     | 1.14 | 0.4824     | 0.0507  | 0.0630     | 0.0029  | 0.0555      | 0.0056  | 0.2775            | 394.1      | 17.5    | 432.4       | 225.9   | 394.1         | 17.5    | 9.7         |
| 1357_011_Zrn_a_01_31 | 244.21    | 139.20     | 1.75 | 0.3380     | 0.0314  | 0.0463     | 0.0025  | 0.0529      | 0.0045  | 0.4210            | 291.9      | 15.6    | 325.3       | 192.5   | 291.9         | 15.6    | 11.4        |
| 1357_011_Zrn_a_01_32 | 124.52    | 69.80      | 1.78 | 0.4275     | 0.0437  | 0.0570     | 0.0035  | 0.0544      | 0.0049  | 0.4704            | 357.6      | 21.6    | 385.6       | 203.6   | 357.6         | 21.6    | 7.8         |
| 1357_011_Zrn_a_01_33 | 188.60    | 112.47     | 1.68 | 0.3550     | 0.0290  | 0.0484     | 0.0024  | 0.0532      | 0.0042  | 0.3419            | 304.7      | 15.0    | 337.3       | 176.9   | 304.7         | 15.0    | 10.7        |
| 1357_011_Zrn_a_01_34 | 122.86    | 134.49     | 0.91 | 0.4589     | 0.0505  | 0.0609     | 0.0032  | 0.0547      | 0.0061  | 0.1803            | 380.9      | 19.1    | 399.4       | 248.9   | 380.9         | 19.1    | 4.9         |
| 1357_011_Zrn_a_01_35 | 263.93    | 196.77     | 1.34 | 0.4931     | 0.0362  | 0.0641     | 0.0028  | 0.0558      | 0.0038  | 0.4004            | 400.6      | 16.8    | 443.8       | 149.7   | 400.6         | 16.8    | 10.8        |
| 1357_011_Zrn_a_01_36 | 312.89    | 230.27     | 1.36 | 0.3727     | 0.0294  | 0.0496     | 0.0025  | 0.0545      | 0.0040  | 0.4038            | 311.9      | 15.5    | 392.3       | 163.8   | 311.9         | 15.5    | 25.8        |
| 1357_011_Zrn_a_01_37 | 892.05    | 881.04     | 1.01 | 0.3518     | 0.0261  | 0.0481     | 0.0022  | 0.0531      | 0.0034  | 0.5015            | 302.6      | 13.7    | 332.6       | 145.3   | 302.6         | 13.7    | 9.9         |
| 1357_011_Zrn_a_01_38 | 797.23    | 442.05     | 1.80 | 0.3513     | 0.0194  | 0.0487     | 0.0020  | 0.0524      | 0.0028  | 0.3610            | 306.3      | 12.4    | 301.1       | 120.4   | 306.3         | 12.4    | -1.7        |
| 1357_011_Zrn_a_01_40 | 361.15    | 93.57      | 3.86 | 0.5489     | 0.0466  | 0.0704     | 0.0039  | 0.0565      | 0.0045  | 0.3952            | 438.8      | 23.4    | 472.6       | 175.7   | 438.8         | 23.4    | 7.7         |
| 1357_011_Zrn_a_01_43 | 187.18    | 140.44     | 1.33 | 0.3227     | 0.0320  | 0.0448     | 0.0029  | 0.0523      | 0.0049  | 0.3923            | 282.2      | 18.0    | 298.8       | 213.6   | 282.2         | 18.0    | 5.9         |
| 1357_011_Zrn_a_01_45 | 252.70    | 67.55      | 3.74 | 1.2578     | 0.0763  | 0.1318     | 0.0055  | 0.0692      | 0.0037  | 0.4672            | 798.3      | 31.1    | 904.6       | 110.7   | 798.3         | 31.1    | 13.3        |
| 1357_011_Zrn_a_01_46 | 233.82    | 148.97     | 1.57 | 0.5945     | 0.0471  | 0.0725     | 0.0035  | 0.0595      | 0.0043  | 0.4131            | 451.0      | 21.3    | 585.5       | 157.6   | 451.0         | 21.3    | 29.8        |
| 1357_011_Zrn_a_01_47 | 442.14    | 375.07     | 1.18 | 0.3853     | 0.0253  | 0.0524     | 0.0020  | 0.0533      | 0.0032  | 0.3779            | 329.5      | 12.5    | 341.5       | 137.8   | 329.5         | 12.5    | 3.7         |
| 1357_011_Zrn_a_01_49 | 433.45    | 325.04     | 1.33 | 0.3185     | 0.0266  | 0.0452     | 0.0018  | 0.0511      | 0.0042  | 0.2440            | 285.0      | 11.3    | 245.5       | 187.9   | 285.0         | 11.3    | -13.9       |
| 1357_011_Zrn_a_01_51 | 97.42     | 52.18      | 1.87 | 0.6237     | 0.0555  | 0.0808     | 0.0034  | 0.0560      | 0.0049  | 0.2348            | 500.6      | 20.3    | 453.0       | 193.8   | 500.6         | 20.3    | -9.5        |
| 1357_011_Zrn_a_01_54 | 730.06    | 249.23     | 2.93 | 0.6429     | 0.0537  | 0.0776     | 0.0045  | 0.0601      | 0.0042  | 0.5602            | 482.0      | 27.1    | 605.5       | 150.0   | 482.0         | 27.1    | 25.6        |
| 1357_011_Zrn_a_01_56 | 411.77    | 185.17     | 2.22 | 0.3494     | 0.0294  | 0.0475     | 0.0025  | 0.0533      | 0.0039  | 0.4966            | 299.4      | 15.1    | 342.4       | 165.3   | 299.4         | 15.1    | 14.4        |
| 1357_011_Zrn_a_01_57 | 71.93     | 76.67      | 0.94 | 1.2442     | 0.1292  | 0.1262     | 0.0068  | 0.0715      | 0.0073  | 0.2621            | 765.9      | 39.1    | 972.4       | 208.0   | 765.9         | 39.1    | 27.0        |
| 1357_011_Zrn_a_01_58 | 268.50    | 136.13     | 1.97 | 0.4762     | 0.0372  | 0.0618     | 0.0029  | 0.0559      | 0.0042  | 0.3295            | 386.7      | 17.5    | 447.2       | 166.0   | 386.7         | 17.5    | 15.7        |
| 1357_011_Zrn_a_01_60 | 83.05     | 64.79      | 1.28 | 1.4157     | 0.1415  | 0.1461     | 0.0080  | 0.0703      | 0.0065  | 0.3896            | 878.8      | 45.1    | 937.2       | 189.7   | 878.8         | 45.1    | 6.6         |
| 1357_011_Zrn_a_01_63 | 103.44    | 76.19      | 1.36 | 0.7152     | 0.0678  | 0.0895     | 0.0058  | 0.0579      | 0.0048  | 0.4878            | 552.8      | 34.3    | 527.0       | 183.5   | 552.8         | 34.3    | -4.7        |
| 1357_011_Zrn_a_01_66 | 375.22    | 301.09     | 1.25 | 0.5251     | 0.0392  | 0.0687     | 0.0042  | 0.0555      | 0.0035  | 0.5662            | 428.0      | 25.4    | 431.1       | 139.8   | 428.0         | 25.4    | 0.7         |
| 1357_011_Zrn_a_01_67 | 83.37     | 35.57      | 2.34 | 0.4206     | 0.0490  | 0.0548     | 0.0025  | 0.0557      | 0.0062  | 0.3044            | 343.7      | 15.5    | 440.7       | 247.2   | 343.7         | 15.5    | 28.2        |
| 1357_011_Zrn_a_01_71 | 100.15    | 107.92     | 0.93 | 1.1548     | 0.0890  | 0.1290     | 0.0056  | 0.0649      | 0.0047  | 0.3506            | 781.9      | 31.8    | 772.4       | 152.5   | 781.9         | 31.8    | -1.2        |
| 1357_011_Zrn_a_01_72 | 233.51    | 214.29     | 1.09 | 0.3297     | 0.0393  | 0.0445     | 0.0026  | 0.0537      | 0.0061  | 0.3147            | 280.9      | 16.0    | 358.0       | 258.0   | 280.9         | 16.0    | 27.5        |
| 1357_011_Zrn_a_01_73 | 362.47    | 240.21     | 1.51 | 0.3324     | 0.0293  | 0.0452     | 0.0024  | 0.0534      | 0.0048  | 0.2220            | 284.9      | 14.6    | 343.9       | 202.9   | 284.9         | 14.6    | 20.7        |
| 1357_011_Zrn_a_01_78 | 622.27    | 727.54     | 0.86 | 0.3329     | 0.0246  | 0.0467     | 0.0024  | 0.0517      | 0.0033  | 0.4992            | 294.4      | 14.7    | 271.3       | 147.4   | 294.4         | 14.7    | -7.8        |

|                       |         |         |       |         |        |        |        |        |        |        |        |       |        |       |        |       |      |
|-----------------------|---------|---------|-------|---------|--------|--------|--------|--------|--------|--------|--------|-------|--------|-------|--------|-------|------|
| 1357_011_Zrn_a_01_80  | 647.07  | 386.24  | 1.68  | 0.4410  | 0.0312 | 0.0577 | 0.0023 | 0.0554 | 0.0036 | 0.4093 | 361.8  | 14.1  | 428.7  | 143.9 | 361.8  | 14.1  | 18.5 |
| 1357_011_Zrn_a_01_82  | 740.23  | 463.52  | 1.60  | 0.6377  | 0.0383 | 0.0788 | 0.0037 | 0.0587 | 0.0029 | 0.5630 | 488.7  | 22.4  | 556.8  | 108.8 | 488.7  | 22.4  | 13.9 |
| 1357_011_Zrn_a_01_84  | 555.66  | 331.25  | 1.68  | 0.3198  | 0.0229 | 0.0437 | 0.0020 | 0.0531 | 0.0037 | 0.2932 | 275.8  | 12.3  | 331.1  | 159.3 | 275.8  | 12.3  | 20.0 |
| 1357_011_Zrn_a_01_85  | 65.98   | 45.99   | 1.43  | 0.3482  | 0.0494 | 0.0473 | 0.0034 | 0.0534 | 0.0076 | 0.2461 | 298.0  | 21.2  | 344.9  | 321.0 | 298.0  | 21.2  | 15.7 |
| 1357_011_Zrn_a_01_87  | 542.63  | 651.11  | 0.83  | 0.3531  | 0.0239 | 0.0486 | 0.0024 | 0.0527 | 0.0031 | 0.5225 | 305.7  | 14.5  | 317.9  | 131.7 | 305.7  | 14.5  | 4.0  |
| 1357_011_Zrn_a_01_89  | 1232.04 | 52.42   | 23.50 | 0.5830  | 0.0285 | 0.0750 | 0.0028 | 0.0564 | 0.0025 | 0.4543 | 466.1  | 16.7  | 467.6  | 96.6  | 466.1  | 16.7  | 0.3  |
| 1357_011_Zrn_a_01_90  | 231.35  | 120.17  | 1.93  | 0.5811  | 0.0458 | 0.0757 | 0.0030 | 0.0557 | 0.0043 | 0.2568 | 470.1  | 18.1  | 440.9  | 170.8 | 470.1  | 18.1  | -6.2 |
| 1357_011_Zrn_a_01_91  | 289.80  | 286.91  | 1.01  | 0.3192  | 0.0357 | 0.0442 | 0.0018 | 0.0524 | 0.0059 | 0.1379 | 278.6  | 11.3  | 303.4  | 256.1 | 278.6  | 11.3  | 8.9  |
| 1357_011_Zrn_a_01_92  | 182.26  | 96.88   | 1.88  | 0.6037  | 0.0498 | 0.0765 | 0.0032 | 0.0572 | 0.0045 | 0.3109 | 475.2  | 19.5  | 500.5  | 173.8 | 475.2  | 19.5  | 5.3  |
| 1357_011_Zrn_a_01_97  | 107.64  | 182.26  | 0.59  | 0.3476  | 0.0393 | 0.0475 | 0.0028 | 0.0531 | 0.0058 | 0.2981 | 298.9  | 17.4  | 333.5  | 249.6 | 298.9  | 17.4  | 11.6 |
| 1357_011_Zrn_a_01_98  | 283.07  | 200.40  | 1.41  | 0.3676  | 0.0330 | 0.0493 | 0.0032 | 0.0541 | 0.0043 | 0.4996 | 310.0  | 19.4  | 375.9  | 177.9 | 310.0  | 19.4  | 21.3 |
| 1357_011_Zrn_a_01_99  | 1078.91 | 160.93  | 6.70  | 0.3257  | 0.0173 | 0.0452 | 0.0017 | 0.0523 | 0.0027 | 0.3424 | 284.8  | 10.5  | 298.0  | 116.2 | 284.8  | 10.5  | 4.6  |
| 1357_011_Zrn_a_01_100 | 518.08  | 297.76  | 1.74  | 0.3533  | 0.0598 | 0.0483 | 0.0035 | 0.0531 | 0.0090 | 0.2084 | 303.9  | 21.5  | 332.3  | 384.5 | 303.9  | 21.5  | 9.3  |
| 1357_011_Zrn_a_01_101 | 238.94  | 123.73  | 1.93  | 0.6429  | 0.0545 | 0.0794 | 0.0038 | 0.0587 | 0.0048 | 0.3342 | 492.7  | 22.9  | 556.5  | 176.7 | 492.7  | 22.9  | 13.0 |
| 1357_011_Zrn_a_01_106 | 71.62   | 69.51   | 1.03  | 0.3613  | 0.0733 | 0.0494 | 0.0024 | 0.0530 | 0.0107 | 0.1075 | 311.1  | 14.8  | 328.9  | 462.9 | 311.1  | 14.8  | 5.7  |
| 1357_011_Zrn_a_01_109 | 404.16  | 392.93  | 1.03  | 0.6696  | 0.0380 | 0.0843 | 0.0030 | 0.0576 | 0.0031 | 0.3710 | 521.7  | 17.7  | 515.2  | 116.5 | 521.7  | 17.7  | -1.2 |
| 1357_011_Zrn_a_01_115 | 176.73  | 241.17  | 0.73  | 0.3424  | 0.0269 | 0.0476 | 0.0018 | 0.0522 | 0.0040 | 0.2724 | 299.5  | 11.4  | 295.1  | 174.4 | 299.5  | 11.4  | -1.5 |
| 1357_011_Zrn_a_01_116 | 601.85  | 206.03  | 2.92  | 0.6117  | 0.0391 | 0.0775 | 0.0025 | 0.0573 | 0.0035 | 0.2708 | 481.1  | 15.2  | 501.7  | 136.2 | 481.1  | 15.2  | 4.3  |
| 1357_011_Zrn_a_01_118 | 227.14  | 103.56  | 2.19  | 0.4313  | 0.0420 | 0.0573 | 0.0023 | 0.0546 | 0.0053 | 0.1893 | 358.9  | 14.2  | 397.3  | 217.3 | 358.9  | 14.2  | 10.7 |
| 1357_011_Zrn_a_01_119 | 1040.30 | 155.06  | 6.71  | 0.6135  | 0.0295 | 0.0781 | 0.0023 | 0.0570 | 0.0027 | 0.2761 | 484.5  | 14.0  | 491.7  | 102.9 | 484.5  | 14.0  | 1.5  |
| 1357_011_Zrn_a_01_120 | 378.49  | 282.19  | 1.34  | 0.9279  | 0.0447 | 0.1071 | 0.0032 | 0.0628 | 0.0030 | 0.2383 | 655.8  | 18.6  | 703.1  | 101.1 | 655.8  | 18.6  | 7.2  |
| 1357_011_Zrn_a_01_9   | 89.52   | 41.72   | 2.15  | 1.9405  | 0.2304 | 0.1707 | 0.0152 | 0.0824 | 0.0088 | 0.4936 | 1015.9 | 83.8  | 1256.2 | 208.5 | 1256.2 | 152.7 | 23.6 |
| 1357_011_Zrn_a_01_20  | 516.42  | 71.97   | 7.18  | 1.5596  | 0.0768 | 0.1574 | 0.0056 | 0.0719 | 0.0029 | 0.5815 | 942.1  | 31.0  | 982.6  | 82.6  | 942.1  | 47.6  | 4.3  |
| 1357_011_Zrn_a_01_41  | 55.72   | 48.41   | 1.15  | 11.1628 | 0.6778 | 0.4896 | 0.0240 | 0.1654 | 0.0076 | 0.6585 | 2569.0 | 104.1 | 2511.2 | 76.8  | 2511.2 | 138.4 | -2.3 |
| 1357_011_Zrn_a_01_42  | 424.70  | 239.92  | 1.77  | 5.2917  | 0.2824 | 0.3311 | 0.0149 | 0.1159 | 0.0053 | 0.5250 | 1843.7 | 72.0  | 1894.2 | 82.7  | 1894.2 | 85.3  | 2.7  |
| 1357_011_Zrn_a_01_50  | 1176.84 | 1766.35 | 0.67  | 4.2168  | 0.1966 | 0.2946 | 0.0104 | 0.1038 | 0.0039 | 0.6317 | 1664.2 | 51.8  | 1693.7 | 68.7  | 1693.7 | 51.7  | 1.8  |
| 1357_011_Zrn_a_01_52  | 277.67  | 152.32  | 1.82  | 2.4260  | 0.1276 | 0.2110 | 0.0084 | 0.0834 | 0.0037 | 0.5285 | 1234.0 | 44.8  | 1278.5 | 87.1  | 1278.5 | 52.6  | 3.6  |
| 1357_011_Zrn_a_01_53  | 121.78  | 95.90   | 1.27  | 4.9272  | 0.2728 | 0.3226 | 0.0125 | 0.1108 | 0.0055 | 0.4412 | 1802.4 | 60.8  | 1812.1 | 90.3  | 1812.1 | 76.6  | 0.5  |
| 1357_011_Zrn_a_01_68  | 57.57   | 77.95   | 0.74  | 1.7156  | 0.1180 | 0.1685 | 0.0089 | 0.0738 | 0.0045 | 0.5032 | 1003.8 | 48.9  | 1037.3 | 121.9 | 1037.3 | 52.9  | 3.3  |
| 1357_011_Zrn_a_01_76  | 170.80  | 92.84   | 1.84  | 9.4629  | 0.5481 | 0.4318 | 0.0212 | 0.1589 | 0.0073 | 0.6098 | 2314.0 | 95.3  | 2444.3 | 78.1  | 2444.3 | 133.2 | 5.6  |
| 1357_011_Zrn_a_01_79  | 234.27  | 59.57   | 3.93  | 6.1763  | 0.5715 | 0.3294 | 0.0285 | 0.1360 | 0.0092 | 0.7035 | 1835.4 | 138.0 | 2176.8 | 118.2 | 2176.8 | 155.4 | 18.6 |
| 1357_011_Zrn_a_01_81  | 163.21  | 95.86   | 1.70  | 10.8169 | 0.5569 | 0.4589 | 0.0192 | 0.1710 | 0.0070 | 0.6014 | 2434.5 | 84.9  | 2567.2 | 68.8  | 2567.2 | 127.6 | 5.5  |
| 1357_011_Zrn_a_01_103 | 337.48  | 89.57   | 3.77  | 10.8116 | 0.4252 | 0.4549 | 0.0148 | 0.1724 | 0.0056 | 0.5633 | 2417.0 | 65.4  | 2580.9 | 54.4  | 2580.9 | 87.7  | 6.8  |
| 1357_011_Zrn_a_01_104 | 222.64  | 99.80   | 2.23  | 4.7581  | 0.2506 | 0.3079 | 0.0121 | 0.1121 | 0.0052 | 0.4886 | 1730.5 | 59.6  | 1833.2 | 83.7  | 1833.2 | 74.0  | 5.9  |
| 1357_011_Zrn_a_01_105 | 727.49  | 697.27  | 1.04  | 12.1810 | 0.5253 | 0.4979 | 0.0186 | 0.1774 | 0.0064 | 0.5518 | 2605.0 | 80.2  | 2628.9 | 60.2  | 2628.9 | 100.4 | 0.9  |
| 1357_011_Zrn_a_01_108 | 69.71   | 68.37   | 1.02  | 1.2674  | 0.1133 | 0.1352 | 0.0092 | 0.0680 | 0.0055 | 0.4923 | 817.2  | 52.3  | 868.8  | 166.5 | 817.2  | 60.5  | 6.3  |
| 1357_011_Zrn_a_01_111 | 906.21  | 269.25  | 3.37  | 10.9110 | 0.4732 | 0.4642 | 0.0166 | 0.1705 | 0.0071 | 0.3642 | 2458.0 | 73.2  | 2562.3 | 69.6  | 2562.3 | 88.7  | 4.2  |
| 1357_011_Zrn_a_01_112 | 367.25  | 238.25  | 1.54  | 15.0608 | 0.5674 | 0.5348 | 0.0170 | 0.2042 | 0.0064 | 0.5500 | 2761.6 | 71.3  | 2860.4 | 51.2  | 2860.4 | 93.5  | 3.6  |
| 1357_011_Zrn_a_01_113 | 878.15  | 96.74   | 9.08  | 12.0706 | 0.4916 | 0.4958 | 0.0180 | 0.1766 | 0.0055 | 0.6373 | 2595.5 | 77.7  | 2621.1 | 52.2  | 2621.1 | 93.3  | 1.0  |

Sample 8-v12-13 Formation A

Coordinates N75°24'51.5"

E135°59'06.3"

| Analysis Name       | [U] (ppm) | [Th] (ppm) | U/Th | 207Pb/235U | 2 sigma | 206Pb/238U | 2 sigma | 207Pb/206Pb | 2 sigma | Error Correlation | 206Pb/238U | 2 sigma | 207Pb/206Pb | 2 sigma | Preferred Age | 2 sigma | Discordance |
|---------------------|-----------|------------|------|------------|---------|------------|---------|-------------|---------|-------------------|------------|---------|-------------|---------|---------------|---------|-------------|
| 1357_009_Zrn_a_01_1 | 198.31    | 106.83     | 1.86 | 0.6022     | 0.0489  | 0.0761     | 0.0037  | 0.0574      | 0.0042  | 0.4443            | 472.7      | 22.3    | 507.0       | 160.4   | 472.7         | 22.3    | 7.3         |
| 1357_009_Zrn_a_01_3 | 320.99    | 264.39     | 1.21 | 0.8212     | 0.0498  | 0.0979     | 0.0047  | 0.0608      | 0.0032  | 0.4979            | 602.2      | 27.4    | 632.8       | 114.5   | 602.2         | 27.4    | 5.1         |
| 1357_009_Zrn_a_01_5 | 208.43    | 79.85      | 2.61 | 1.3187     | 0.0957  | 0.1316     | 0.0057  | 0.0727      | 0.0048  | 0.3994            | 796.7      | 32.5    | 1005.7      | 135.3   | 796.7         | 32.5    | 26.2        |
| 1357_009_Zrn_a_01_6 | 88.11     | 46.90      | 1.88 | 1.9040     | 0.1504  | 0.1780     | 0.0094  | 0.0776      | 0.0054  | 0.4778            | 1056.2     | 51.2    | 1135.8      | 138.8   | 1135.8        | 138.8   | 7.5         |

|                       |         |         |       |        |        |        |        |        |        |        |        |       |        |       |        |       |      |
|-----------------------|---------|---------|-------|--------|--------|--------|--------|--------|--------|--------|--------|-------|--------|-------|--------|-------|------|
| 1357_009_Zrn_a_01_8   | 113.33  | 52.99   | 2.14  | 0.7865 | 0.0624 | 0.0960 | 0.0053 | 0.0594 | 0.0045 | 0.3573 | 591.1  | 31.1  | 582.0  | 166.3 | 591.1  | 31.1  | -1.5 |
| 1357_009_Zrn_a_01_9   | 1240.31 | 1070.29 | 1.16  | 0.7045 | 0.0397 | 0.0863 | 0.0037 | 0.0592 | 0.0027 | 0.5842 | 533.5  | 22.1  | 575.1  | 99.6  | 533.5  | 22.1  | 7.8  |
| 1357_009_Zrn_a_01_12  | 193.89  | 170.36  | 1.14  | 0.7485 | 0.0607 | 0.0893 | 0.0041 | 0.0608 | 0.0046 | 0.3522 | 551.5  | 24.3  | 631.3  | 164.3 | 551.5  | 24.3  | 14.5 |
| 1357_009_Zrn_a_01_13  | 659.99  | 77.79   | 8.48  | 1.0545 | 0.1784 | 0.1134 | 0.0090 | 0.0674 | 0.0110 | 0.3039 | 692.6  | 52.2  | 851.0  | 339.9 | 692.6  | 52.2  | 22.9 |
| 1357_009_Zrn_a_01_19  | 70.68   | 54.99   | 1.29  | 0.8177 | 0.0860 | 0.0952 | 0.0061 | 0.0623 | 0.0069 | 0.1937 | 586.4  | 36.2  | 683.5  | 235.6 | 586.4  | 36.2  | 16.6 |
| 1357_009_Zrn_a_01_20  | 542.69  | 263.85  | 2.06  | 0.4667 | 0.0325 | 0.0626 | 0.0026 | 0.0541 | 0.0035 | 0.3984 | 391.2  | 15.6  | 375.6  | 143.8 | 391.2  | 15.6  | -4.0 |
| 1357_009_Zrn_a_01_21  | 71.43   | 62.94   | 1.13  | 1.9069 | 0.1541 | 0.1789 | 0.0080 | 0.0773 | 0.0058 | 0.3754 | 1061.2 | 43.9  | 1128.6 | 149.6 | 1128.6 | 98.5  | 6.3  |
| 1357_009_Zrn_a_01_22  | 427.18  | 97.26   | 4.39  | 0.5563 | 0.0386 | 0.0711 | 0.0034 | 0.0567 | 0.0037 | 0.4025 | 442.8  | 20.2  | 481.7  | 142.4 | 442.8  | 20.2  | 8.8  |
| 1357_009_Zrn_a_01_25  | 185.59  | 216.68  | 0.86  | 0.8963 | 0.0592 | 0.1054 | 0.0045 | 0.0616 | 0.0038 | 0.3633 | 646.3  | 26.3  | 661.8  | 133.0 | 646.3  | 26.3  | 2.4  |
| 1357_009_Zrn_a_01_26  | 308.91  | 769.07  | 0.40  | 0.6558 | 0.0389 | 0.0834 | 0.0034 | 0.0570 | 0.0032 | 0.3748 | 516.3  | 20.1  | 493.3  | 122.1 | 516.3  | 20.1  | -4.5 |
| 1357_009_Zrn_a_01_27  | 1111.37 | 652.47  | 1.70  | 0.7034 | 0.0300 | 0.0875 | 0.0030 | 0.0583 | 0.0022 | 0.4747 | 540.9  | 17.7  | 540.5  | 82.1  | 540.9  | 17.7  | -0.1 |
| 1357_009_Zrn_a_01_29  | 982.33  | 1067.68 | 0.92  | 0.5351 | 0.0253 | 0.0680 | 0.0024 | 0.0570 | 0.0026 | 0.3437 | 424.3  | 14.6  | 493.4  | 98.8  | 424.3  | 14.6  | 16.3 |
| 1357_009_Zrn_a_01_31  | 727.30  | 453.48  | 1.60  | 0.5536 | 0.0267 | 0.0720 | 0.0026 | 0.0558 | 0.0025 | 0.4042 | 448.2  | 15.7  | 442.8  | 98.4  | 448.2  | 15.7  | -1.2 |
| 1357_009_Zrn_a_01_32  | 300.51  | 209.67  | 1.43  | 0.5934 | 0.0473 | 0.0770 | 0.0035 | 0.0559 | 0.0041 | 0.3780 | 478.3  | 21.1  | 447.4  | 164.5 | 478.3  | 21.1  | -6.5 |
| 1357_009_Zrn_a_01_37  | 197.80  | 126.21  | 1.57  | 0.5101 | 0.0442 | 0.0658 | 0.0025 | 0.0562 | 0.0047 | 0.2555 | 410.9  | 15.3  | 460.6  | 186.0 | 410.9  | 15.3  | 12.1 |
| 1357_009_Zrn_a_01_40  | 717.96  | 1176.77 | 0.61  | 0.5311 | 0.0338 | 0.0678 | 0.0023 | 0.0568 | 0.0035 | 0.3008 | 422.8  | 13.8  | 484.9  | 134.1 | 422.8  | 13.8  | 14.7 |
| 1357_009_Zrn_a_01_44  | 95.62   | 68.03   | 1.41  | 1.8643 | 0.1246 | 0.1788 | 0.0068 | 0.0756 | 0.0047 | 0.3524 | 1060.4 | 37.2  | 1085.1 | 125.5 | 1085.1 | 125.5 | 2.3  |
| 1357_009_Zrn_a_01_46  | 333.46  | 132.47  | 2.52  | 0.7822 | 0.0572 | 0.0938 | 0.0038 | 0.0605 | 0.0041 | 0.3646 | 578.0  | 22.4  | 620.7  | 147.1 | 578.0  | 22.4  | 7.4  |
| 1357_009_Zrn_a_01_47  | 62.25   | 21.40   | 2.91  | 1.9650 | 0.1747 | 0.1813 | 0.0097 | 0.0786 | 0.0067 | 0.3357 | 1074.3 | 53.0  | 1161.7 | 169.1 | 1161.7 | 169.1 | 8.1  |
| 1357_009_Zrn_a_01_49  | 432.01  | 198.92  | 2.17  | 0.5204 | 0.0309 | 0.0689 | 0.0026 | 0.0548 | 0.0029 | 0.4284 | 429.6  | 15.7  | 402.6  | 120.3 | 429.6  | 15.7  | -6.3 |
| 1357_009_Zrn_a_01_50  | 94.58   | 66.29   | 1.43  | 0.7653 | 0.0771 | 0.0941 | 0.0041 | 0.0590 | 0.0057 | 0.2785 | 579.5  | 24.4  | 567.2  | 211.4 | 579.5  | 24.4  | -2.1 |
| 1357_009_Zrn_a_01_54  | 239.30  | 182.07  | 1.31  | 0.6413 | 0.0512 | 0.0782 | 0.0037 | 0.0595 | 0.0045 | 0.3595 | 485.4  | 22.0  | 584.6  | 162.8 | 485.4  | 22.0  | 20.4 |
| 1357_009_Zrn_a_01_64  | 454.12  | 518.70  | 0.88  | 0.7023 | 0.0502 | 0.0835 | 0.0038 | 0.0610 | 0.0044 | 0.2469 | 517.1  | 22.4  | 638.7  | 153.7 | 517.1  | 22.4  | 23.5 |
| 1357_009_Zrn_a_01_86  | 214.70  | 17.18   | 12.50 | 1.2558 | 0.2966 | 0.1288 | 0.0193 | 0.0707 | 0.0157 | 0.3779 | 781.1  | 110.0 | 948.8  | 458.7 | 781.1  | 110.0 | 21.5 |
| 1357_009_Zrn_a_01_93  | 651.46  | 226.90  | 2.87  | 0.8537 | 0.0508 | 0.1026 | 0.0045 | 0.0604 | 0.0030 | 0.5343 | 629.5  | 26.1  | 616.5  | 108.7 | 629.5  | 26.1  | -2.1 |
| 1357_009_Zrn_a_01_94  | 111.51  | 110.09  | 1.01  | 0.6042 | 0.0516 | 0.0784 | 0.0042 | 0.0559 | 0.0050 | 0.1828 | 486.6  | 25.4  | 448.0  | 198.4 | 486.6  | 25.4  | -7.9 |
| 1357_009_Zrn_a_01_98  | 178.95  | 56.67   | 3.16  | 1.5084 | 0.1039 | 0.1570 | 0.0072 | 0.0697 | 0.0041 | 0.5157 | 939.9  | 39.8  | 919.3  | 121.4 | 939.9  | 39.8  | -2.2 |
| 1357_009_Zrn_a_01_102 | 271.52  | 158.81  | 1.71  | 0.5083 | 0.0363 | 0.0647 | 0.0027 | 0.0570 | 0.0039 | 0.2927 | 404.1  | 16.5  | 490.6  | 152.5 | 404.1  | 16.5  | 21.4 |
| 1357_009_Zrn_a_01_103 | 134.63  | 76.65   | 1.76  | 0.5982 | 0.0527 | 0.0748 | 0.0035 | 0.0580 | 0.0048 | 0.3616 | 465.0  | 20.7  | 529.7  | 180.3 | 465.0  | 20.7  | 13.9 |
| 1357_009_Zrn_a_01_107 | 347.69  | 392.03  | 0.89  | 0.6774 | 0.0543 | 0.0865 | 0.0036 | 0.0568 | 0.0044 | 0.2734 | 534.6  | 21.1  | 484.5  | 171.2 | 534.6  | 21.1  | -9.4 |
| 1357_009_Zrn_a_01_109 | 237.85  | 190.00  | 1.25  | 0.8451 | 0.0516 | 0.1026 | 0.0045 | 0.0598 | 0.0032 | 0.5031 | 629.4  | 26.5  | 594.8  | 114.6 | 629.4  | 26.5  | -5.5 |
| 1357_009_Zrn_a_01_111 | 157.44  | 75.43   | 2.09  | 1.6004 | 0.1001 | 0.1605 | 0.0068 | 0.0723 | 0.0041 | 0.4280 | 959.8  | 37.9  | 994.5  | 115.3 | 959.8  | 37.9  | 3.6  |
| 1357_009_Zrn_a_01_113 | 74.10   | 69.82   | 1.06  | 3.4480 | 0.3123 | 0.2629 | 0.0109 | 0.0951 | 0.0084 | 0.2406 | 1504.4 | 55.8  | 1530.8 | 166.6 | 1530.8 | 166.6 | 1.8  |
| 1357_009_Zrn_a_01_114 | 40.36   | 17.99   | 2.24  | 0.6217 | 0.1146 | 0.0774 | 0.0051 | 0.0582 | 0.0105 | 0.2279 | 480.8  | 30.5  | 538.3  | 396.3 | 480.8  | 30.5  | 11.9 |
| 1357_009_Zrn_a_01_116 | 907.78  | 1176.93 | 0.77  | 0.5179 | 0.0253 | 0.0690 | 0.0023 | 0.0545 | 0.0025 | 0.3835 | 429.9  | 13.9  | 390.6  | 101.4 | 429.9  | 13.9  | -9.1 |
| 1357_009_Zrn_a_01_117 | 2739.80 | 1307.98 | 2.09  | 0.5382 | 0.0252 | 0.0687 | 0.0025 | 0.0568 | 0.0024 | 0.4070 | 428.6  | 14.9  | 483.2  | 94.6  | 428.6  | 14.9  | 12.7 |
| 1357_009_Zrn_a_01_118 | 545.59  | 232.82  | 2.34  | 0.5694 | 0.0332 | 0.0718 | 0.0029 | 0.0575 | 0.0031 | 0.3816 | 446.9  | 17.2  | 511.8  | 119.2 | 446.9  | 17.2  | 14.5 |
| 1357_009_Zrn_a_01_120 | 847.03  | 175.93  | 4.81  | 0.5056 | 0.0370 | 0.0654 | 0.0027 | 0.0561 | 0.0040 | 0.2903 | 408.3  | 16.3  | 455.9  | 157.0 | 408.3  | 16.3  | 11.7 |
| 1357_009_Zrn_a_01_14  | 1357.38 | 973.25  | 1.39  | 0.5480 | 0.0258 | 0.0691 | 0.0027 | 0.0575 | 0.0022 | 0.5747 | 430.6  | 16.5  | 512.3  | 84.6  | 430.6  | 16.5  | 19.0 |
| 1357_009_Zrn_a_01_24  | 1158.62 | 626.25  | 1.85  | 0.8489 | 0.0399 | 0.1034 | 0.0042 | 0.0595 | 0.0023 | 0.5755 | 634.4  | 24.3  | 586.6  | 83.5  | 634.4  | 24.3  | -7.5 |
| 1357_009_Zrn_a_01_15  | 459.83  | 226.39  | 2.03  | 0.8810 | 0.0481 | 0.1054 | 0.0050 | 0.0606 | 0.0029 | 0.5335 | 646.0  | 29.2  | 625.8  | 101.5 | 646.0  | 29.2  | -3.1 |
| 1357_009_Zrn_a_01_104 | 883.97  | 232.04  | 3.81  | 1.3415 | 0.0782 | 0.1370 | 0.0071 | 0.0710 | 0.0031 | 0.6679 | 827.7  | 40.0  | 957.7  | 88.9  | 827.7  | 40.0  | 15.7 |
| 1357_009_Zrn_a_01_78  | 177.98  | 116.60  | 1.53  | 1.4291 | 0.0882 | 0.1454 | 0.0068 | 0.0713 | 0.0038 | 0.5259 | 875.0  | 38.2  | 965.9  | 107.6 | 875.0  | 38.2  | 10.4 |
| 1357_009_Zrn_a_01_80  | 451.45  | 194.41  | 2.32  | 1.5069 | 0.0813 | 0.1559 | 0.0070 | 0.0701 | 0.0032 | 0.5378 | 934.0  | 39.1  | 931.4  | 94.0  | 934.0  | 39.1  | -0.3 |
| 1357_009_Zrn_a_01_92  | 147.23  | 76.57   | 1.92  | 1.5213 | 0.1011 | 0.1606 | 0.0083 | 0.0687 | 0.0040 | 0.5093 | 960.3  | 46.2  | 889.4  | 119.8 | 960.3  | 46.2  | -7.4 |
| 1357_009_Zrn_a_01_39  | 402.38  | 62.30   | 6.46  | 1.5935 | 0.0797 | 0.1657 | 0.0062 | 0.0697 | 0.0031 | 0.4442 | 988.4  | 34.1  | 920.8  | 92.2  | 988.4  | 34.1  | -6.8 |
| 1357_009_Zrn_a_01_105 | 553.31  | 124.54  | 4.44  | 1.6016 | 0.0838 | 0.1640 | 0.0066 | 0.0708 | 0.0033 | 0.4553 | 979.0  | 36.3  | 952.4  | 95.6  | 979.0  | 36.3  | -2.7 |

|                       |         |        |       |        |        |        |        |        |        |        |        |       |        |       |        |       |      |
|-----------------------|---------|--------|-------|--------|--------|--------|--------|--------|--------|--------|--------|-------|--------|-------|--------|-------|------|
| 1357_009_Zrn_a_01_119 | 333.86  | 135.55 | 2.46  | 1.6376 | 0.0774 | 0.1658 | 0.0056 | 0.0716 | 0.0032 | 0.3592 | 989.1  | 30.9  | 975.1  | 89.9  | 989.1  | 30.9  | -1.4 |
| 1357_009_Zrn_a_01_53  | 575.37  | 164.76 | 3.49  | 1.7959 | 0.0827 | 0.1750 | 0.0062 | 0.0744 | 0.0029 | 0.5606 | 1039.3 | 34.2  | 1053.6 | 77.4  | 1053.6 | 77.4  | 1.4  |
| 1357_009_Zrn_a_01_45  | 118.11  | 80.50  | 1.47  | 1.8668 | 0.1099 | 0.1781 | 0.0079 | 0.0760 | 0.0041 | 0.4363 | 1056.8 | 43.0  | 1095.1 | 107.5 | 1095.1 | 107.5 | 3.6  |
| 1357_009_Zrn_a_01_101 | 117.66  | 104.40 | 1.13  | 1.9078 | 0.1311 | 0.1769 | 0.0095 | 0.0782 | 0.0048 | 0.4883 | 1050.0 | 51.8  | 1152.5 | 121.5 | 1152.5 | 121.5 | 9.8  |
| 1357_009_Zrn_a_01_96  | 189.22  | 12.34  | 15.33 | 1.9478 | 0.1197 | 0.1862 | 0.0093 | 0.0759 | 0.0037 | 0.6134 | 1100.6 | 50.5  | 1092.0 | 97.4  | 1092.0 | 97.4  | -0.8 |
| 1357_009_Zrn_a_01_69  | 407.81  | 130.83 | 3.12  | 1.9671 | 0.1017 | 0.1858 | 0.0079 | 0.0768 | 0.0032 | 0.5788 | 1098.4 | 42.9  | 1116.0 | 84.2  | 1116.0 | 84.2  | 1.6  |
| 1357_009_Zrn_a_01_106 | 191.99  | 97.98  | 1.96  | 2.0448 | 0.1484 | 0.1777 | 0.0105 | 0.0834 | 0.0057 | 0.4263 | 1054.5 | 57.4  | 1279.7 | 134.0 | 1279.7 | 134.0 | 21.4 |
| 1357_009_Zrn_a_01_16  | 137.45  | 55.70  | 2.47  | 2.0646 | 0.1460 | 0.1932 | 0.0093 | 0.0775 | 0.0048 | 0.4948 | 1138.7 | 50.4  | 1134.1 | 122.6 | 1134.1 | 122.6 | -0.4 |
| 1357_009_Zrn_a_01_33  | 386.27  | 105.06 | 3.68  | 2.0742 | 0.1177 | 0.1911 | 0.0072 | 0.0787 | 0.0040 | 0.4442 | 1127.4 | 38.7  | 1165.1 | 100.7 | 1165.1 | 100.7 | 3.3  |
| 1357_009_Zrn_a_01_43  | 418.06  | 137.69 | 3.04  | 2.2429 | 0.1240 | 0.1948 | 0.0078 | 0.0835 | 0.0040 | 0.5113 | 1147.3 | 42.3  | 1281.1 | 92.6  | 1281.1 | 92.6  | 11.7 |
| 1357_009_Zrn_a_01_91  | 361.65  | 111.36 | 3.25  | 2.2498 | 0.1163 | 0.2017 | 0.0087 | 0.0809 | 0.0034 | 0.5763 | 1184.2 | 46.8  | 1219.4 | 83.2  | 1219.4 | 83.2  | 3.0  |
| 1357_009_Zrn_a_01_90  | 549.62  | 136.85 | 4.02  | 2.3296 | 0.1324 | 0.1926 | 0.0081 | 0.0877 | 0.0046 | 0.4049 | 1135.2 | 44.0  | 1376.9 | 101.0 | 1376.9 | 101.0 | 21.3 |
| 1357_009_Zrn_a_01_51  | 145.39  | 76.92  | 1.89  | 2.3432 | 0.1946 | 0.1972 | 0.0133 | 0.0862 | 0.0053 | 0.6701 | 1160.3 | 71.4  | 1342.1 | 119.6 | 1342.1 | 119.6 | 15.7 |
| 1357_009_Zrn_a_01_68  | 174.58  | 117.60 | 1.48  | 2.4354 | 0.1380 | 0.2111 | 0.0086 | 0.0837 | 0.0042 | 0.4785 | 1234.4 | 45.9  | 1285.4 | 97.0  | 1285.4 | 97.0  | 4.1  |
| 1357_009_Zrn_a_01_63  | 270.65  | 167.14 | 1.62  | 2.4504 | 0.1651 | 0.2082 | 0.0098 | 0.0854 | 0.0051 | 0.4777 | 1219.2 | 52.5  | 1323.7 | 115.1 | 1323.7 | 115.1 | 8.6  |
| 1357_009_Zrn_a_01_36  | 71.88   | 27.33  | 2.63  | 2.4535 | 0.2096 | 0.2122 | 0.0119 | 0.0839 | 0.0064 | 0.4536 | 1240.5 | 63.2  | 1289.4 | 149.4 | 1289.4 | 149.4 | 3.9  |
| 1357_009_Zrn_a_01_61  | 48.70   | 18.45  | 2.64  | 2.4734 | 0.2437 | 0.2188 | 0.0145 | 0.0820 | 0.0068 | 0.5390 | 1275.7 | 76.8  | 1244.9 | 163.3 | 1244.9 | 163.3 | -2.4 |
| 1357_009_Zrn_a_01_87  | 439.49  | 315.75 | 1.39  | 2.5914 | 0.1465 | 0.2158 | 0.0108 | 0.0871 | 0.0045 | 0.4680 | 1259.7 | 57.2  | 1362.4 | 100.2 | 1362.4 | 100.2 | 8.2  |
| 1357_009_Zrn_a_01_35  | 341.70  | 95.04  | 3.60  | 2.6921 | 0.1187 | 0.2236 | 0.0078 | 0.0873 | 0.0034 | 0.4692 | 1301.1 | 40.8  | 1367.2 | 75.0  | 1367.2 | 75.0  | 5.1  |
| 1357_009_Zrn_a_01_56  | 530.35  | 256.60 | 2.07  | 2.7099 | 0.1485 | 0.2243 | 0.0105 | 0.0876 | 0.0038 | 0.6128 | 1304.7 | 55.2  | 1374.0 | 83.5  | 1374.0 | 83.5  | 5.3  |
| 1357_009_Zrn_a_01_57  | 211.00  | 44.35  | 4.76  | 2.7363 | 0.1385 | 0.2295 | 0.0088 | 0.0865 | 0.0037 | 0.5279 | 1331.6 | 46.0  | 1349.2 | 83.0  | 1349.2 | 83.0  | 1.3  |
| 1357_009_Zrn_a_01_62  | 843.42  | 455.87 | 1.85  | 3.0626 | 0.1355 | 0.2419 | 0.0088 | 0.0918 | 0.0035 | 0.5271 | 1396.4 | 45.8  | 1463.9 | 71.5  | 1463.9 | 71.5  | 4.8  |
| 1357_009_Zrn_a_01_34  | 588.61  | 72.73  | 8.09  | 3.0867 | 0.1563 | 0.2398 | 0.0103 | 0.0933 | 0.0038 | 0.6051 | 1385.9 | 53.8  | 1494.8 | 76.3  | 1494.8 | 76.3  | 7.9  |
| 1357_009_Zrn_a_01_73  | 65.76   | 53.49  | 1.23  | 3.1219 | 0.2114 | 0.2512 | 0.0132 | 0.0901 | 0.0054 | 0.4860 | 1444.8 | 67.8  | 1428.2 | 115.0 | 1428.2 | 115.0 | -1.1 |
| 1357_009_Zrn_a_01_85  | 1449.38 | 826.85 | 1.75  | 3.1343 | 0.1784 | 0.2454 | 0.0135 | 0.0926 | 0.0041 | 0.6515 | 1414.5 | 69.9  | 1480.7 | 83.8  | 1480.7 | 83.8  | 4.7  |
| 1357_009_Zrn_a_01_55  | 1094.45 | 865.60 | 1.26  | 3.1362 | 0.1800 | 0.2394 | 0.0125 | 0.0950 | 0.0038 | 0.7188 | 1383.7 | 65.0  | 1528.1 | 75.3  | 1528.1 | 75.3  | 10.4 |
| 1357_009_Zrn_a_01_75  | 494.38  | 680.10 | 0.73  | 3.1564 | 0.1471 | 0.2509 | 0.0104 | 0.0912 | 0.0036 | 0.5428 | 1443.3 | 53.7  | 1451.4 | 74.9  | 1451.4 | 74.9  | 0.6  |
| 1357_009_Zrn_a_01_88  | 630.90  | 164.27 | 3.84  | 3.1792 | 0.1532 | 0.2485 | 0.0094 | 0.0928 | 0.0039 | 0.5016 | 1430.5 | 48.4  | 1483.9 | 79.0  | 1483.9 | 79.0  | 3.7  |
| 1357_009_Zrn_a_01_71  | 128.48  | 90.69  | 1.42  | 3.2648 | 0.2234 | 0.2432 | 0.0114 | 0.0974 | 0.0060 | 0.4422 | 1403.1 | 59.1  | 1574.6 | 115.7 | 1574.6 | 115.7 | 12.2 |
| 1357_009_Zrn_a_01_11  | 241.48  | 141.34 | 1.71  | 3.1977 | 0.1959 | 0.2480 | 0.0107 | 0.0935 | 0.0049 | 0.5146 | 1428.0 | 55.3  | 1498.6 | 99.4  | 1498.6 | 99.4  | 4.9  |
| 1357_009_Zrn_a_01_74  | 209.38  | 50.16  | 4.17  | 3.4040 | 0.1740 | 0.2612 | 0.0105 | 0.0945 | 0.0038 | 0.6231 | 1496.2 | 53.4  | 1518.2 | 75.9  | 1518.2 | 75.9  | 1.5  |
| 1357_009_Zrn_a_01_60  | 213.63  | 131.38 | 1.63  | 3.4877 | 0.2122 | 0.2661 | 0.0127 | 0.0950 | 0.0046 | 0.6043 | 1521.2 | 64.4  | 1529.0 | 91.3  | 1529.0 | 91.3  | 0.5  |
| 1357_009_Zrn_a_01_100 | 118.14  | 152.00 | 0.78  | 3.6551 | 0.2303 | 0.2732 | 0.0130 | 0.0970 | 0.0054 | 0.4913 | 1557.3 | 65.9  | 1567.5 | 103.7 | 1567.5 | 103.7 | 0.7  |
| 1357_009_Zrn_a_01_112 | 271.94  | 551.65 | 0.49  | 3.8911 | 0.1742 | 0.2755 | 0.0095 | 0.1024 | 0.0040 | 0.4784 | 1568.7 | 48.2  | 1668.7 | 72.8  | 1668.7 | 72.8  | 6.4  |
| 1357_009_Zrn_a_01_115 | 427.17  | 203.93 | 2.09  | 3.9489 | 0.1845 | 0.2817 | 0.0108 | 0.1017 | 0.0040 | 0.5324 | 1600.0 | 54.3  | 1654.7 | 73.3  | 1654.7 | 73.3  | 3.4  |
| 1357_009_Zrn_a_01_41  | 423.19  | 222.83 | 1.90  | 3.9523 | 0.1718 | 0.2792 | 0.0100 | 0.1027 | 0.0038 | 0.5416 | 1587.5 | 50.6  | 1672.7 | 67.7  | 1672.7 | 67.7  | 5.4  |
| 1357_009_Zrn_a_01_18  | 284.00  | 201.93 | 1.41  | 4.0127 | 0.1836 | 0.2817 | 0.0108 | 0.1033 | 0.0036 | 0.6521 | 1599.7 | 54.5  | 1684.7 | 64.5  | 1684.7 | 64.5  | 5.3  |
| 1357_009_Zrn_a_01_84  | 42.35   | 17.05  | 2.48  | 4.0240 | 0.3568 | 0.2962 | 0.0164 | 0.0985 | 0.0080 | 0.4132 | 1672.4 | 81.4  | 1596.5 | 152.1 | 1596.5 | 152.1 | -4.5 |
| 1357_009_Zrn_a_01_52  | 152.14  | 98.86  | 1.54  | 4.1174 | 0.2256 | 0.2843 | 0.0123 | 0.1050 | 0.0050 | 0.4930 | 1612.9 | 61.8  | 1715.0 | 88.3  | 1715.0 | 88.3  | 6.3  |
| 1357_009_Zrn_a_01_48  | 127.12  | 122.24 | 1.04  | 4.1194 | 0.2894 | 0.2811 | 0.0157 | 0.1063 | 0.0059 | 0.6188 | 1596.7 | 79.2  | 1736.9 | 101.6 | 1736.9 | 101.6 | 8.8  |
| 1357_009_Zrn_a_01_65  | 98.26   | 70.60  | 1.39  | 4.2249 | 0.2120 | 0.2949 | 0.0108 | 0.1039 | 0.0046 | 0.4674 | 1665.8 | 53.8  | 1695.3 | 81.8  | 1695.3 | 81.8  | 1.8  |
| 1357_009_Zrn_a_01_59  | 35.37   | 22.41  | 1.58  | 4.2369 | 0.5944 | 0.2913 | 0.0353 | 0.1055 | 0.0093 | 0.7824 | 1647.9 | 176.4 | 1723.1 | 161.3 | 1723.1 | 161.3 | 4.6  |
| 1357_009_Zrn_a_01_66  | 338.03  | 171.82 | 1.97  | 4.2855 | 0.2253 | 0.3056 | 0.0136 | 0.1017 | 0.0038 | 0.6965 | 1719.0 | 67.3  | 1655.5 | 70.1  | 1655.5 | 70.1  | -3.7 |
| 1357_009_Zrn_a_01_89  | 782.55  | 165.21 | 4.74  | 4.4329 | 0.2344 | 0.3086 | 0.0148 | 0.1042 | 0.0041 | 0.6733 | 1734.0 | 73.1  | 1699.7 | 72.2  | 1699.7 | 72.2  | -2.0 |
| 1357_009_Zrn_a_01_81  | 517.62  | 147.83 | 3.50  | 4.4562 | 0.2965 | 0.2954 | 0.0170 | 0.1094 | 0.0062 | 0.5522 | 1668.5 | 84.6  | 1789.6 | 103.9 | 1789.6 | 103.9 | 7.3  |
| 1357_009_Zrn_a_01_72  | 167.79  | 90.67  | 1.85  | 4.4629 | 0.2231 | 0.2969 | 0.0115 | 0.1090 | 0.0044 | 0.6023 | 1675.9 | 57.4  | 1783.2 | 73.2  | 1783.2 | 73.2  | 6.4  |
| 1357_009_Zrn_a_01_10  | 247.87  | 69.31  | 3.58  | 4.4893 | 0.2205 | 0.3051 | 0.0132 | 0.1067 | 0.0040 | 0.6486 | 1716.4 | 65.2  | 1744.3 | 68.5  | 1744.3 | 68.5  | 1.6  |

|                       |        |        |       |         |        |        |        |        |        |        |        |       |        |       |        |       |      |
|-----------------------|--------|--------|-------|---------|--------|--------|--------|--------|--------|--------|--------|-------|--------|-------|--------|-------|------|
| 1357_009_Zrn_a_01_70  | 92.75  | 36.37  | 2.55  | 4.5810  | 0.2538 | 0.3060 | 0.0137 | 0.1086 | 0.0054 | 0.4593 | 1720.9 | 67.7  | 1775.8 | 91.2  | 1775.8 | 91.2  | 3.2  |
| 1357_009_Zrn_a_01_28  | 760.73 | 276.03 | 2.76  | 4.6789  | 0.1770 | 0.3142 | 0.0103 | 0.1080 | 0.0033 | 0.6160 | 1761.4 | 50.7  | 1765.9 | 56.4  | 1765.9 | 56.4  | 0.3  |
| 1357_009_Zrn_a_01_7   | 242.54 | 77.86  | 3.12  | 4.8096  | 0.2195 | 0.3210 | 0.0119 | 0.1087 | 0.0042 | 0.5308 | 1794.8 | 58.3  | 1777.0 | 70.6  | 1777.0 | 70.6  | -1.0 |
| 1357_009_Zrn_a_01_17  | 278.89 | 92.96  | 3.00  | 4.7945  | 0.2635 | 0.3092 | 0.0135 | 0.1125 | 0.0049 | 0.6173 | 1736.6 | 66.7  | 1839.8 | 78.3  | 1839.8 | 78.3  | 5.9  |
| 1357_009_Zrn_a_01_38  | 218.25 | 94.80  | 2.30  | 5.1942  | 0.2353 | 0.3315 | 0.0120 | 0.1136 | 0.0043 | 0.5498 | 1845.8 | 58.2  | 1858.3 | 68.5  | 1858.3 | 68.5  | 0.7  |
| 1357_009_Zrn_a_01_42  | 384.29 | 139.08 | 2.76  | 5.3558  | 0.2219 | 0.3354 | 0.0119 | 0.1158 | 0.0041 | 0.5115 | 1864.7 | 57.4  | 1892.4 | 64.0  | 1892.4 | 64.0  | 1.5  |
| 1357_009_Zrn_a_01_83  | 269.22 | 100.89 | 2.67  | 5.4380  | 0.2932 | 0.3440 | 0.0156 | 0.1147 | 0.0051 | 0.5780 | 1905.8 | 74.9  | 1874.5 | 79.6  | 1874.5 | 79.6  | -1.6 |
| 1357_009_Zrn_a_01_108 | 98.61  | 117.49 | 0.84  | 5.6623  | 0.4180 | 0.3561 | 0.0180 | 0.1153 | 0.0077 | 0.4451 | 1963.8 | 85.8  | 1884.8 | 120.2 | 1884.8 | 120.2 | -4.0 |
| 1357_009_Zrn_a_01_77  | 114.20 | 72.11  | 1.58  | 6.0775  | 0.3360 | 0.3492 | 0.0174 | 0.1262 | 0.0053 | 0.6568 | 1930.9 | 83.2  | 2046.0 | 74.2  | 2046.0 | 74.2  | 6.0  |
| 1357_009_Zrn_a_01_67  | 218.06 | 6.00   | 36.34 | 12.9268 | 0.8081 | 0.5019 | 0.0279 | 0.1868 | 0.0070 | 0.7984 | 2621.8 | 119.8 | 2714.3 | 62.2  | 2714.3 | 62.2  | 3.5  |
| 1357_009_Zrn_a_01_23  | 251.37 | 203.52 | 1.24  | 13.0988 | 0.8388 | 0.4991 | 0.0273 | 0.1904 | 0.0097 | 0.6116 | 2609.8 | 117.5 | 2745.2 | 84.1  | 2745.2 | 84.1  | 5.2  |
| 1357_009_Zrn_a_01_95  | 230.41 | 260.13 | 0.89  | 13.4210 | 0.6663 | 0.5214 | 0.0219 | 0.1867 | 0.0070 | 0.6521 | 2705.2 | 92.6  | 2713.2 | 62.2  | 2713.2 | 62.2  | 0.3  |
| 1357_009_Zrn_a_01_58  | 97.47  | 123.12 | 0.79  | 14.9928 | 0.7761 | 0.5569 | 0.0266 | 0.1952 | 0.0069 | 0.7316 | 2854.0 | 110.1 | 2786.8 | 57.8  | 2786.8 | 57.8  | -2.4 |
