# Supplementary material
Source: publisher figshare collection journal article supplement (https://tandf.figshare.com/articles/dataset/_/1297346)
Supplement: Supplementary file 2 [file 1]

| Sample N | Formation | SiO2 % | Al2O3% | TiO2 % | Fe2O3 % | MnO % | MgO % | CaO % | Na2O % | K2O % | P2O5 % | L.O.I. % |
|----------|-----------|--------|--------|--------|---------|-------|-------|-------|--------|-------|--------|----------|
| 5-v12-4  | B         | 67.9   | 9.09   | 0.61   | 4.92    | 0.058 | 2.69  | 5.47  | 0.36   | 1.39  | 0.12   | 7.3      |
| 5-v12-6  | B         | 60.7   | 14.5   | 1      | 5.69    | 0.07  | 3.13  | 4.24  | 0.62   | 2.61  | 0.15   | 7.37     |
| 5-v12-10 | B         | 62     | 16.3   | 1.07   | 5.55    | 0.036 | 3.09  | 2.54  | 0.62   | 2.96  | 0.18   | 5.61     |
| 5-v12-11 | B         | 61.1   | 3.51   | 0.25   | 2.18    | 0.066 | 1.23  | 16.9  | 0.1    | 0.49  | 0.092  | 14.2     |
| 5-v12-15 | B         | 69.4   | 6.08   | 0.45   | 3.54    | 0.072 | 1.69  | 8.53  | 0.28   | 0.93  | 0.12   | 8.99     |
| 5-v12-16 | B         | 66.3   | 9.77   | 0.67   | 5.16    | 0.072 | 2.44  | 6     | 0.4    | 1.58  | 0.12   | 7.38     |
| 5-v12-18 | B         | 49.1   | 3.62   | 0.24   | 3.08    | 0.17  | 1.34  | 22.6  | 0.1    | 0.47  | 0.092  | 19.4     |
| 5-v12-22 | B         | 58.1   | 7.02   | 0.57   | 4.37    | 0.12  | 3.22  | 11.8  | 0.27   | 1.18  | 0.12   | 13.3     |
| 12-AP-20 | B         | 48.7   | 3.85   | 0.25   | 2.78    | 0.063 | 1.69  | 22.3  | 0.12   | 0.51  | 0.091  | 19.8     |
| 7-v12-1  | A         | 56.6   | 15.9   | 0.89   | 7.09    | 0.07  | 3.36  | 4.71  | 0.66   | 2.89  | 0.13   | 7.54     |
| 7-v12-3  | A         | 45.8   | 9.7    | 0.57   | 8.52    | 0.19  | 3.99  | 14.2  | 0.37   | 1.13  | 0.11   | 15.3     |
| 7-v12-5  | A         | 58.6   | 6.28   | 0.47   | 6.24    | 0.15  | 3.7   | 10.1  | 0.23   | 0.71  | 0.1    | 13.4     |
| 8-v12-9  | A         | 74.4   | 9.98   | 0.73   | 5.56    | 0.03  | 2.94  | 0.76  | 3.12   | 0.19  | 0.13   | 2.14     |
| 8-v12-10 | A         | 54.9   | 20.6   | 1.1    | 7.69    | 0.031 | 3.81  | 0.61  | 2.15   | 4.06  | 0.14   | 4.69     |
| 8-v12-13 | A         | 78.1   | 8.07   | 0.59   | 5.25    | 0.042 | 2.69  | 0.61  | 0.27   | 1.25  | 0.13   | 2.85     |
| 8-v12-14 | A         | 58.3   | 15.2   | 0.87   | 6.4     | 0.057 | 2.98  | 5.24  | 0.28   | 3.11  | 0.14   | 7.19     |
| 8-v12-20 | A         | 52.4   | 19     | 0.93   | 6.8     | 0.054 | 3.26  | 5.28  | 0.32   | 4     | 0.13   | 7.69     |
| 8-v12-21 | A         | 59     | 12.4   | 0.78   | 5.28    | 0.065 | 2.63  | 7.95  | 1.09   | 2.06  | 0.13   | 8.56     |
| 8-v12-23 | A         | 50.7   | 10.5   | 0.6    | 6.67    | 0.11  | 3.5   | 12.6  | 0.78   | 1.49  | 0.11   | 12.7     |
| 8-v12-24 | A         | 50.7   | 13.3   | 0.69   | 6.68    | 0.093 | 4     | 9.2   | 0.64   | 2.34  | 0.12   | 12       |
| 8-v12-28 | A         | 69.8   | 11.5   | 0.77   | 3.18    | 0.03  | 2.17  | 4.03  | 1.12   | 2.01  | 0.13   | 5.15     |
| 8-v12-29 | A         | 60.5   | 18.4   | 1.03   | 3.98    | 0.026 | 2.83  | 2.51  | 0.88   | 3.86  | 0.14   | 5.76     |
| 12-AP-31 | C         | 61.8   | 16.5   | 0.73   | 4.8     | 0.071 | 1.97  | 1.58  | 2.15   | 3.38  | 0.15   | 6.43     |
| 12-AP-33 | C         | 52.7   | 13     | 0.43   | 3.45    | 0.16  | 1.83  | 10.5  | 4.33   | 1.54  | 0.099  | 11.9     |
| 12-AP-34 | C         | 49.1   | 11.6   | 0.41   | 7.11    | 0.35  | 3.38  | 9.37  | 2.17   | 2.16  | 0.14   | 14.1     |
| 12-AP-35 | C         | 51     | 13.1   | 0.43   | 3.4     | 0.16  | 1.95  | 11.1  | 3.7    | 1.87  | 0.098  | 13.1     |
| 12-AP-36 | C         | 53.3   | 13.1   | 0.46   | 5.35    | 0.23  | 2.97  | 7.28  | 2.71   | 2.34  | 0.1    | 12.1     |
| 12-AP-37 | C         | 50.3   | 12.8   | 0.46   | 4.52    | 0.23  | 2.52  | 10.2  | 3.83   | 1.79  | 0.12   | 13.2     |
| 12-AP-38 | C         | 63.7   | 17.1   | 0.7    | 2.89    | 0.049 | 1.34  | 1.51  | 2.98   | 3.27  | 0.13   | 6.16     |
| 12-AP-39 | C         | 63     | 11.6   | 0.46   | 3.96    | 0.39  | 1.93  | 5.27  | 3.63   | 1.51  | 0.1    | 8.08     |
| 12-AP-41 | C         | 32.4   | 9.86   | 0.32   | 8.01    | 0.84  | 6.31  | 16    | 2.8    | 1.44  | 0.08   | 21.8     |
| 12-AP-42 | C         | 46.5   | 13.5   | 0.97   | 8.69    | 0.16  | 6.46  | 9.54  | 1.52   | 1.36  | 0.11   | 11       |

|                 |                  |               |               |               |              |               |               |               |               |               |              |               |
|-----------------|------------------|---------------|---------------|---------------|--------------|---------------|---------------|---------------|---------------|---------------|--------------|---------------|
| 12-AP-43        | C                | 63.4          | 12            | 0.46          | 3.57         | 0.34          | 1.6           | 4.97          | 6.36          | 0.31          | 0.058        | 6.87          |
| <b>Sample N</b> | <b>Formation</b> | <b>Rb ppm</b> | <b>Sr ppm</b> | <b>Nb ppm</b> | <b>V ppm</b> | <b>Cr ppm</b> | <b>Co ppm</b> | <b>Ni ppm</b> | <b>Cu ppm</b> | <b>Zn ppm</b> | <b>Y ppm</b> | <b>Zr ppm</b> |
| 5-v12-4         | B                | 70.5          | 101           | 11            | 82.2         | 66.8          | 7.93          | 32.2          | 27.2          | 62.4          | 25.2         | 217           |
| 5-v12-6         | B                | 136           | 102           | 18.2          | 120          | 93.4          | 16.2          | 41.1          | 46            | 87.4          | 35.3         | 310           |
| 5-v12-10        | B                | 155           | 90.3          | 18.8          | 132          | 97.5          | 15            | 43.3          | 56.9          | 111           | 40.3         | 322           |
| 5-v12-11        | B                | 27.7          | 268           | 5.29          | 36.4         | 49.1          | 5.59          | 19.7          | 20.3          | 58.3          | 20.4         | 245           |
| 5-v12-15        | B                | 49.5          | 163           | 8.53          | 54.9         | 64.4          | 7.86          | 28            | 25.2          | 70.2          | 26           | 245           |
| 5-v12-16        | B                | 84.4          | 118           | 12.6          | 79.7         | 72.9          | 15.2          | 37.1          | 41.2          | 221           | 28           | 225           |
| 5-v12-18        | B                | 22.4          | 302           | 4.92          | 34.2         | 44.8          | 6.7           | 21.1          | 13.4          | 84.9          | 18.2         | 213           |
| 5-v12-22        | B                | 52.4          | 149           | 9.36          | 53.4         | 58.1          | 10.9          | 29.1          | 23.5          | 294           | 34.4         | 314           |
| 12-AP-20        | B                | 23.6          | 307           | 5.21          | 36.7         | 52.9          | 5.29          | 19.5          | 20.7          | 59.6          | 18.1         | 247           |
| 7-v12-1         | A                | 133           | 92.7          | 13.8          | 121          | 90.9          | 17.5          | 44.3          | 45.8          | 133           | 29.4         | 166           |
| 7-v12-3         | A                | 49.2          | 180           | 9.23          | 66           | 61            | 5.99          | 47            | 74.7          | 545           | 24.4         | 201           |
| 7-v12-5         | A                | 32.7          | 111           | 8.14          | 53.2         | 56.2          | 6.39          | 34.7          | 43.9          | 1380          | 27.6         | 228           |
| 8-v12-9         | A                | 8.34          | 74            | 12.6          | 78.1         | 71.9          | 11.4          | 35            | 29.6          | 79.4          | 34.3         | 258           |
| 8-v12-10        | A                | 200           | 86.1          | 17.6          | 169          | 109           | 22.5          | 50.4          | 18.3          | 102           | 27.2         | 180           |
| 8-v12-13        | A                | 57.9          | 17.2          | 10.3          | 69.9         | 61.5          | 9.63          | 30.5          | 25.9          | 142           | 23.1         | 236           |
| 8-v12-14        | A                | 134           | 95.5          | 14            | 108          | 84.9          | 15            | 42.3          | 33.7          | 125           | 29.6         | 181           |
| 8-v12-20        | A                | 194           | 106           | 15.1          | 150          | 102           | 14.7          | 48.2          | 35.6          | 138           | 28.5         | 140           |
| 8-v12-21        | A                | 95.4          | 152           | 12.5          | 88.7         | 75.8          | 13.6          | 40.3          | 34            | 163           | 28.6         | 203           |
| 8-v12-23        | A                | 61.4          | 198           | 9.97          | 76           | 64.3          | 21            | 42.7          | 61            | 295           | 26           | 201           |
| 8-v12-24        | A                | 99.4          | 145           | 10.5          | 109          | 68.6          | 15.6          | 44.6          | 46.3          | 201           | 25.2         | 161           |
| 8-v12-28        | A                | 91.4          | 76.4          | 12.9          | 84.5         | 64.6          | 7.37          | 28.8          | 28.3          | 79.2          | 26           | 207           |
| 8-v12-29        | C                | 175           | 77            | 15.3          | 137          | 102           | 9.56          | 38.6          | 27.9          | 101           | 28.9         | 191           |
| 12-AP-31        | C                | 113           | 197           | 14.4          | 87.8         | 49.2          | 7.01          | 24.4          | 42.2          | 191           | 28           | 216           |
| 12-AP-33        | C                | 51.7          | 677           | 9.69          | 38.2         | 37.3          | 2.37          | 12.9          | 9.05          | 87.1          | 11.8         | 163           |
| 12-AP-34        | C                | 70            | 725           | 9.18          | 35.4         | 34.3          | 4.73          | 14.1          | 10.4          | 55.1          | 19.5         | 173           |
| 12-AP-35        | C                | 59.6          | 678           | 9.62          | 37.5         | 33.1          | 2.85          | 12.2          | 11.4          | 45.6          | 12.2         | 153           |
| 12-AP-36        | C                | 71.6          | 596           | 10.4          | 33.1         | 31            | 5.13          | 14.2          | 9.88          | 43            | 16.1         | 164           |
| 12-AP-37        | C                | 58.6          | 671           | 10.1          | 39.9         | 32            | 1.28          | 10            | 10.4          | 53.4          | 10.7         | 188           |
| 12-AP-38        | C                | 116           | 237           | 14.3          | 65.9         | 46.4          | 10.2          | 19.9          | 27.7          | 47            | 24.7         | 241           |
| 12-AP-39        | C                | 49.4          | 355           | 9.12          | 38.9         | 40.2          | 6.13          | 14.5          | 18.8          | 68.7          | 16.7         | 193           |
| 12-AP-41        | C                | 37.3          | 989           | 8.13          | 37           | 30.3          | 6.96          | 16.4          | 14.5          | 67.4          | 22.2         | 131           |

| 12-AP-42 | C         | 46.3   | 583    | 5.49   | 198    | 350    | 36.9   | 76.2   | 80.6   | 109    | 18.2   | 112    |
|----------|-----------|--------|--------|--------|--------|--------|--------|--------|--------|--------|--------|--------|
| 12-AP-43 | belkov    | 9.38   | 381    | 10     | 35.7   | 67.2   | 8.89   | 17.7   | 58.4   | 30.9   | 19.4   | 200    |
| Sample N | Formation | Ce ppm | Pr ppm | Nd ppm | Sm ppm | Eu ppm | Gd ppm | Tb ppm | Dy ppm | Ho ppm | Er ppm | Tm ppm |
| 5-v12-4  | B         | 53.1   | 6.42   | 24.2   | 4.89   | 0.82   | 4.61   | 0.76   | 4.48   | 0.94   | 2.75   | 0.37   |
| 5-v12-6  | B         | 71.8   | 8.97   | 35.3   | 6.93   | 1.11   | 6.23   | 1.07   | 5.94   | 1.24   | 3.75   | 0.57   |
| 5-v12-10 | B         | 77.6   | 10.1   | 37.4   | 7.32   | 1.23   | 7.73   | 1.18   | 7.1    | 1.4    | 4.37   | 0.62   |
| 5-v12-11 | B         | 34.2   | 4.52   | 17.5   | 4.13   | 0.89   | 4.22   | 0.67   | 3.43   | 0.68   | 2.06   | 0.24   |
| 5-v12-15 | B         | 49.1   | 6.17   | 25.2   | 5.79   | 1.11   | 5.29   | 0.82   | 4.47   | 0.89   | 2.64   | 0.35   |
| 5-v12-16 | B         | 44     | 5.43   | 21.9   | 5.27   | 1.1    | 5.12   | 0.87   | 4.96   | 0.98   | 2.9    | 0.43   |
| 5-v12-18 | B         | 33.5   | 4.35   | 17.2   | 4.1    | 1.08   | 4.46   | 0.62   | 3.46   | 0.66   | 1.93   | 0.28   |
| 5-v12-22 | B         | 39.8   | 4.92   | 19.9   | 5.48   | 1.35   | 5.94   | 1.02   | 6.01   | 1.2    | 3.5    | 0.49   |
| 12-AP-20 | B         | 29.4   | 3.84   | 15.4   | 3.52   | 0.71   | 3.31   | 0.53   | 3.02   | 0.58   | 1.73   | 0.27   |
| 7-v12-1  | A         | 69.9   | 8.56   | 30.6   | 6.19   | 1.19   | 5.72   | 0.87   | 5.25   | 1.05   | 3.07   | 0.44   |
| 7-v12-3  | A         | 31.2   | 4.54   | 19.9   | 6.39   | 1.21   | 5.04   | 0.78   | 4.27   | 0.83   | 2.72   | 0.4    |
| 7-v12-5  | A         | 24.1   | 3.36   | 14.8   | 5.01   | 0.99   | 4.87   | 0.86   | 4.81   | 0.96   | 2.94   | 0.42   |
| 8-v12-9  | A         | 69.9   | 7.97   | 30.6   | 6.91   | 1.38   | 6.7    | 1.04   | 5.84   | 1.15   | 3.52   | 0.49   |
| 8-v12-10 | A         | 59.4   | 6.83   | 25.8   | 5.46   | 0.99   | 4.75   | 0.74   | 4.55   | 0.96   | 3.01   | 0.45   |
| 8-v12-13 | A         | 50.4   | 6.27   | 22.9   | 5.51   | 1.01   | 4.93   | 0.74   | 4.21   | 0.81   | 2.46   | 0.34   |
| 8-v12-14 | A         | 63     | 7.95   | 29     | 6.44   | 1.23   | 6.03   | 0.86   | 5.35   | 1.06   | 3.12   | 0.46   |
| 8-v12-20 | A         | 84.6   | 10.4   | 37.5   | 7.22   | 1.35   | 6.72   | 0.88   | 5.17   | 1      | 3.14   | 0.44   |
| 8-v12-21 | A         | 53.9   | 6.76   | 28.7   | 6.18   | 1.04   | 5.43   | 0.82   | 4.78   | 0.99   | 2.99   | 0.42   |
| 8-v12-23 | A         | 48.7   | 6.35   | 26.9   | 6.61   | 1.2    | 5.85   | 0.8    | 4.73   | 0.86   | 2.78   | 0.4    |
| 8-v12-24 | A         | 64.1   | 8.4    | 33.3   | 8.08   | 1.46   | 6.14   | 0.83   | 4.82   | 0.83   | 2.69   | 0.41   |
| 8-v12-28 | A         | 53.9   | 6.56   | 27.1   | 6.04   | 1.05   | 5.26   | 0.8    | 4.64   | 0.9    | 2.84   | 0.38   |
| 8-v12-29 | A         | 70.3   | 8      | 31.7   | 5.97   | 1      | 5.19   | 0.78   | 4.84   | 0.99   | 2.85   | 0.47   |
| 12-AP-31 | C         | 70.6   | 8.45   | 31.6   | 6.23   | 1.07   | 5.44   | 0.77   | 4.92   | 0.94   | 2.97   | 0.42   |
| 12-AP-33 | C         | 43.3   | 4.69   | 16.4   | 2.96   | 0.52   | 2.35   | 0.34   | 2      | 0.42   | 1.22   | 0.19   |
| 12-AP-34 | C         | 46.5   | 5.38   | 20.5   | 4.78   | 1.28   | 4.45   | 0.63   | 3.4    | 0.61   | 1.97   | 0.26   |
| 12-AP-35 | C         | 52.1   | 5.54   | 19.9   | 3.46   | 0.64   | 2.99   | 0.43   | 2.13   | 0.47   | 1.42   | 0.23   |
| 12-AP-36 | C         | 54.1   | 6.32   | 22.1   | 4.53   | 1.05   | 3.97   | 0.52   | 3.03   | 0.62   | 1.66   | 0.23   |
| 12-AP-37 | C         | 36.5   | 3.88   | 12.5   | 2.32   | 0.42   | 1.83   | 0.31   | 1.85   | 0.39   | 1.21   | 0.18   |
| 12-AP-38 | C         | 74.4   | 8.88   | 33.9   | 6.75   | 1.14   | 5.93   | 0.82   | 4.64   | 0.89   | 2.65   | 0.42   |
| 12-AP-39 | C         | 47.3   | 5.22   | 19.9   | 4.45   | 0.93   | 3.66   | 0.55   | 2.75   | 0.58   | 1.7    | 0.24   |

| 12-AP-41 | C         | 58.7   | 6.82   | 25.7   | 5.16   | 1.44   | 4.56  | 0.75   | 3.69 | 0.72 | 2.16 | 0.3  |
|----------|-----------|--------|--------|--------|--------|--------|-------|--------|------|------|------|------|
| 12-AP-42 | C         | 27.1   | 3.36   | 14.5   | 3.44   | 1.07   | 3.52  | 0.51   | 3.32 | 0.71 | 1.79 | 0.26 |
| 12-AP-43 | C         | 49.4   | 5.9    | 23     | 4.65   | 1.06   | 4.03  | 0.57   | 3.34 | 0.62 | 1.9  | 0.29 |
| Sample N | Formation | Lu ppm | Hf ppm | Ta ppm | Pb ppm | Th ppm | U ppm | Sc ppm |      |      |      |      |
| 5-v12-4  | B         | 0.39   | 5.65   | 0.68   | 8.22   | 8.88   | 2.41  | 10.1   |      |      |      |      |
| 5-v12-6  | B         | 0.57   | 8.27   | 1.26   | 1.21   | 13.1   | 3.1   | 15.1   |      |      |      |      |
| 5-v12-10 | B         | 0.65   | 8.62   | 1.35   | 13.4   | 13.8   | 3     | 21.7   |      |      |      |      |
| 5-v12-11 | B         | 0.31   | 6.18   | 0.35   | 14.3   | 5.59   | 1.45  | 7.87   |      |      |      |      |
| 5-v12-15 | B         | 0.39   | 6.45   | 0.59   | 13     | 7.15   | 1.87  | 8.56   |      |      |      |      |
| 5-v12-16 | B         | 0.48   | 5.91   | 0.84   | 55.6   | 8.82   | 2.28  | 12.7   |      |      |      |      |
| 5-v12-18 | B         | 0.3    | 5.78   | 0.35   | 17.7   | 4.78   | 1.63  | 7.74   |      |      |      |      |
| 5-v12-22 | B         | 0.52   | 7.74   | 0.69   | 15.1   | 7.94   | 2.13  | 10.4   |      |      |      |      |
| 12-AP-20 | B         | 0.28   | 5.98   | 0.35   | 21.9   | 4.6    | 1.55  | 10.5   |      |      |      |      |
| 7-v12-1  | A         | 0.5    | 4.77   | 0.92   | 27.4   | 10.6   | 2.49  | 23.1   |      |      |      |      |
| 7-v12-3  | A         | 0.4    | 5.28   | 0.68   | 14.3   | 7.6    | 1.79  | 13.9   |      |      |      |      |
| 7-v12-5  | A         | 0.42   | 5.77   | 0.59   | 13.4   | 6.72   | 1.62  | 13.5   |      |      |      |      |
| 8-v12-9  | A         | 0.45   | 6.12   | 0.86   | 18.9   | 9.51   | 1.98  | 11.1   |      |      |      |      |
| 8-v12-10 | A         | 0.49   | 4.84   | 1.22   | 16.9   | 12.3   | 2.09  | 24.2   |      |      |      |      |
| 8-v12-13 | A         | 0.34   | 5.88   | 0.73   | 15.8   | 8.25   | 1.73  | 8.12   |      |      |      |      |
| 8-v12-14 | A         | 0.46   | 4.98   | 0.92   | 16.4   | 10.5   | 2.67  | 15.5   |      |      |      |      |
| 8-v12-20 | A         | 0.47   | 3.84   | 1.05   | 19.2   | 11.5   | 2.61  | 29.3   |      |      |      |      |
| 8-v12-21 | A         | 0.47   | 5.43   | 0.87   | 22     | 9.41   | 2.61  | 17.2   |      |      |      |      |
| 8-v12-23 | A         | 0.42   | 5.07   | 0.66   | 26.5   | 7.83   | 1.97  | 16.5   |      |      |      |      |
| 8-v12-24 | A         | 0.42   | 3.83   | 0.78   | 21.3   | 8.65   | 2.15  | 17.6   |      |      |      |      |
| 8-v12-28 | A         | 0.44   | 5.24   | 0.81   | 10.8   | 9.28   | 2.38  | 16.9   |      |      |      |      |
| 8-v12-29 | A         | 0.5    | 5.01   | 1.03   | 22.5   | 12.1   | 2.88  | 30.6   |      |      |      |      |
| 12-AP-31 | C         | 0.52   | 5.44   | 0.93   | 18.9   | 10.8   | 3.25  | 15.9   |      |      |      |      |
| 12-AP-33 | C         | 0.19   | 3.95   | 0.61   | 6.15   | 7.69   | 1.88  | 5.46   |      |      |      |      |
| 12-AP-34 | C         | 0.31   | 4.34   | 0.72   | 13.6   | 6.64   | 1.89  | 7.78   |      |      |      |      |
| 12-AP-35 | C         | 0.24   | 4.02   | 0.72   | 10.5   | 8.04   | 2.53  | 8.07   |      |      |      |      |
| 12-AP-36 | C         | 0.26   | 4.26   | 0.79   | 11.2   | 8.08   | 1.98  | 6.19   |      |      |      |      |
| 12-AP-37 | C         | 0.21   | 4.69   | 0.77   | 7.21   | 7.77   | 2.23  | 6.03   |      |      |      |      |
| 12-AP-38 | C         | 0.44   | 6.54   | 1.12   | 5.68   | 11.7   | 3.02  | 9.79   |      |      |      |      |

|          |   |      |      |      |      |      |      |      |
|----------|---|------|------|------|------|------|------|------|
| 12-AP-39 | C | 0.26 | 4.81 | 0.64 | 10.1 | 6.31 | 1.68 | 8.89 |
| 12-AP-41 | C | 0.29 | 3.18 | 0.57 | 28.4 | 6.39 | 2.22 | 9.51 |
| 12-AP-42 | C | 0.28 | 2.46 | 0.32 | 9.9  | 2.1  | 0.74 | 34.1 |
| 12-AP-43 | C | 0.32 | 4.84 | 0.67 | 9.26 | 7.02 | 1.91 | 12.3 |

| Sum % |
|-------|
| 100   |
| 100   |
| 99.9  |
| 100   |
| 100   |
| 99.9  |
| 100   |
| 100   |
| 100   |
| 99.9  |
| 99.9  |
| 100   |
| 100   |
| 99.8  |
| 99.9  |
| 99.8  |
| 99.8  |
| 99.9  |
| 99.8  |
| 99.7  |
| 99.9  |
| 100   |
| 99.6  |
| 99.9  |
| 99.9  |
| 100   |
| 99.9  |
| 99.9  |
| 99.9  |
| 100   |
| 99.8  |
| 99.9  |

|               |
|---------------|
| 99.9          |
| <b>La ppm</b> |
| 26.4          |
| 34.5          |
| 37.6          |
| 16.1          |
| 22.8          |
| 20.7          |
| 16.1          |
| 18.8          |
| 14.7          |
| 32.6          |
| 13.9          |
| 10.7          |
| 29.9          |
| 25            |
| 23.8          |
| 31.2          |
| 39.8          |
| 24.5          |
| 22.6          |
| 28.4          |
| 25.6          |
| 35.2          |
| 33.5          |
| 20.5          |
| 22.7          |
| 24.8          |
| 26.4          |
| 18.3          |
| 35.9          |
| 23            |
| 29.1          |

|               |
|---------------|
| 13.2          |
| 23.6          |
| <b>Yb ppm</b> |
| 2.53          |
| 4.09          |
| 3.86          |
| 1.82          |
| 2.41          |
| 3.22          |
| 1.71          |
| 3.51          |
| 1.81          |
| 3.38          |
| 2.75          |
| 2.65          |
| 3.17          |
| 3.27          |
| 2.35          |
| 2.96          |
| 3.11          |
| 3.09          |
| 2.58          |
| 2.62          |
| 2.66          |
| 3.15          |
| 3.19          |
| 1.46          |
| 1.9           |
| 1.47          |
| 1.71          |
| 1.41          |
| 2.64          |
| 1.84          |



|      |
|------|
| 1.88 |
| 1.83 |
| 2.04 |
